# Supplementary material
Source: PubMed Central journal article supplement (PMC6959005)
Supplement: NIHMS1066515-supplement-Supplementary_information.pdf [file NIHMS1066515-supplement-Supplementary_information.pdf]

In the format provided by the authors and unedited.

# Qualifying antibodies for image-based immune profiling and multiplexed tissue imaging

Ziming Du<sup>1,2,11</sup>, Jia-Ren Lin<sup>2,3,11</sup> , Rumana Rashid<sup>1,4,11</sup>, Zoltan Maliga<sup>2,3</sup>, Shu Wang<sup>2,3,5</sup>,  
Jon C. Aster<sup>1,2</sup>, Benjamin Izar<sup>2,3,6,7</sup>, Peter K. Sorger<sup>2,3,8\*</sup>  and Sandro Santagata<sup>1,2,3,9,10\*</sup> 

---

<sup>1</sup>Department of Pathology, Brigham and Women's Hospital, Harvard Medical School, Boston, MA, USA. <sup>2</sup>Ludwig Center for Cancer Research at Harvard, Harvard Medical School, Boston, MA, USA. <sup>3</sup>Laboratory of Systems Pharmacology, Harvard Medical School, Boston, MA, USA. <sup>4</sup>Department of Biomedical Informatics, Harvard Medical School, Boston, MA, USA. <sup>5</sup>Harvard Graduate Program in Biophysics, Harvard University, Boston, MA, USA. <sup>6</sup>Department of Medical Oncology, Dana-Farber Cancer Institute, Boston, MA, USA. <sup>7</sup>Broad Institute of MIT and Harvard, Boston, MA, USA. <sup>8</sup>Department of Systems Biology, Harvard Medical School, Boston, MA, USA. <sup>9</sup>Department of Oncologic Pathology, Dana-Farber Cancer Institute, Boston, MA, USA. <sup>10</sup>Department of Pathology, Boston Children's Hospital, Boston, MA, USA. \*e-mail: [peter\\_sorger@hms.harvard.edu](mailto:peter_sorger@hms.harvard.edu); [ssantagata@bics.bwh.harvard.edu](mailto:ssantagata@bics.bwh.harvard.edu)

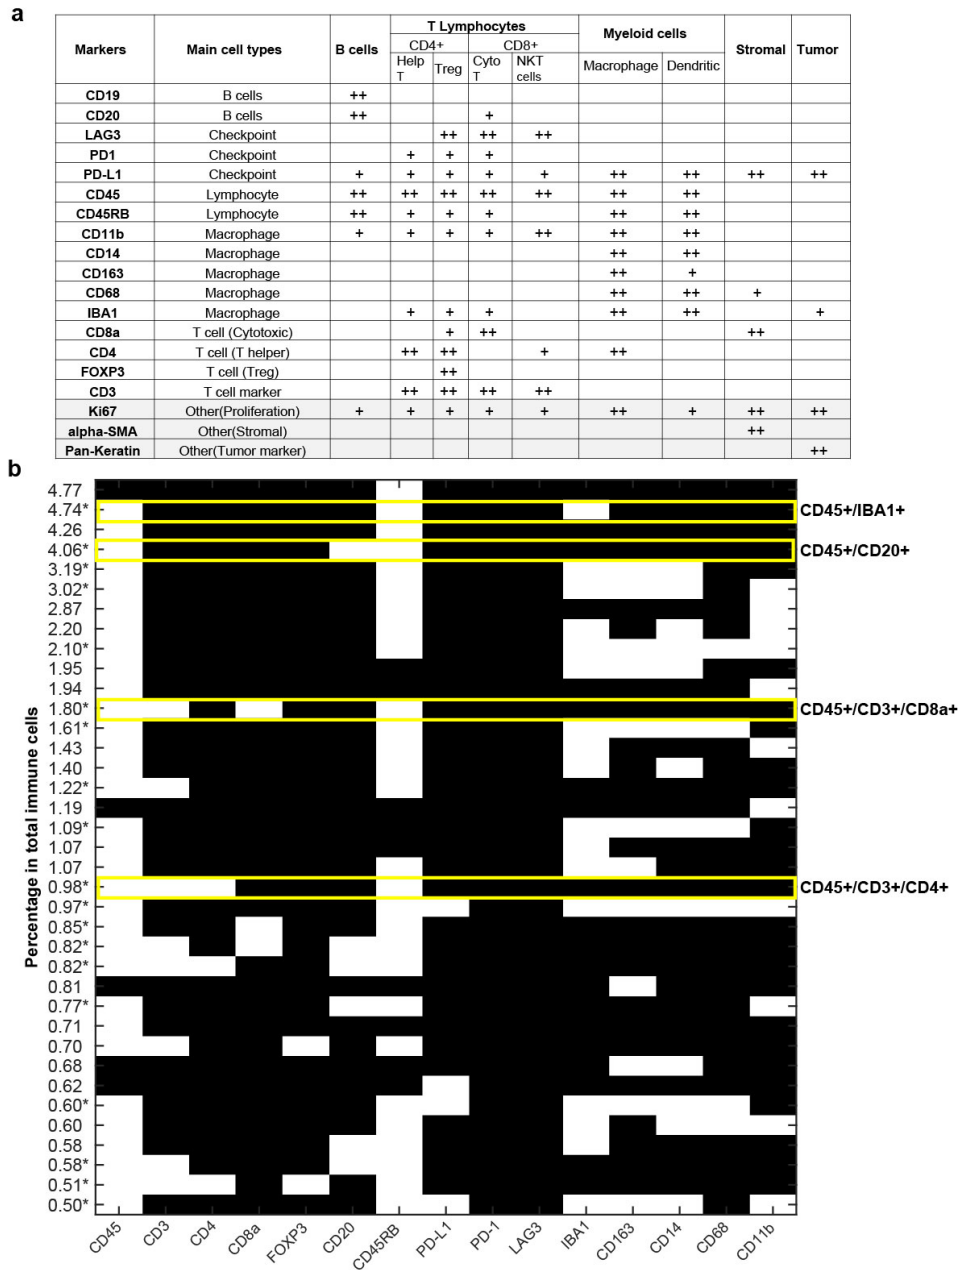

**Supplementary Figure 1**

Markers and major cell types identified by the t-CyCIF immune panel.

a) Canonical immune cell types and their markers. Seven major immune cell subtypes were assayed using a panel of 16 markers. Three additional markers (Ki-67,  $\alpha$ -SMA and pan-keratin) were used to identify cell states (Ki-67 for proliferative cells) or separate immune cells from tumour cells (keratin-positive) or stromal cells ( $\alpha$ -SMA-positive). b) Actual immune subpopulation identified from t-CyCIF immune profiling of LUNG-3-PR. 23,079 immune cells (keratin/ $\alpha$ -SMA-negative cells) from the sample were used for binary gating of 15 different markers. A total of 1,356 different subpopulations were identified, of which 37 subpopulations represented >0.5% of total immune cells. The four subpopulations highlighted here are CD45+/IBA1+ (macrophage or dendritic cells), CD45+/CD20+ (B cells), CD45+/CD3+/CD8a+ (cytotoxic T cells) and CD45+/CD3+/CD4+ (helper T cells). Asterisks label 19 common immune cell subtypes.

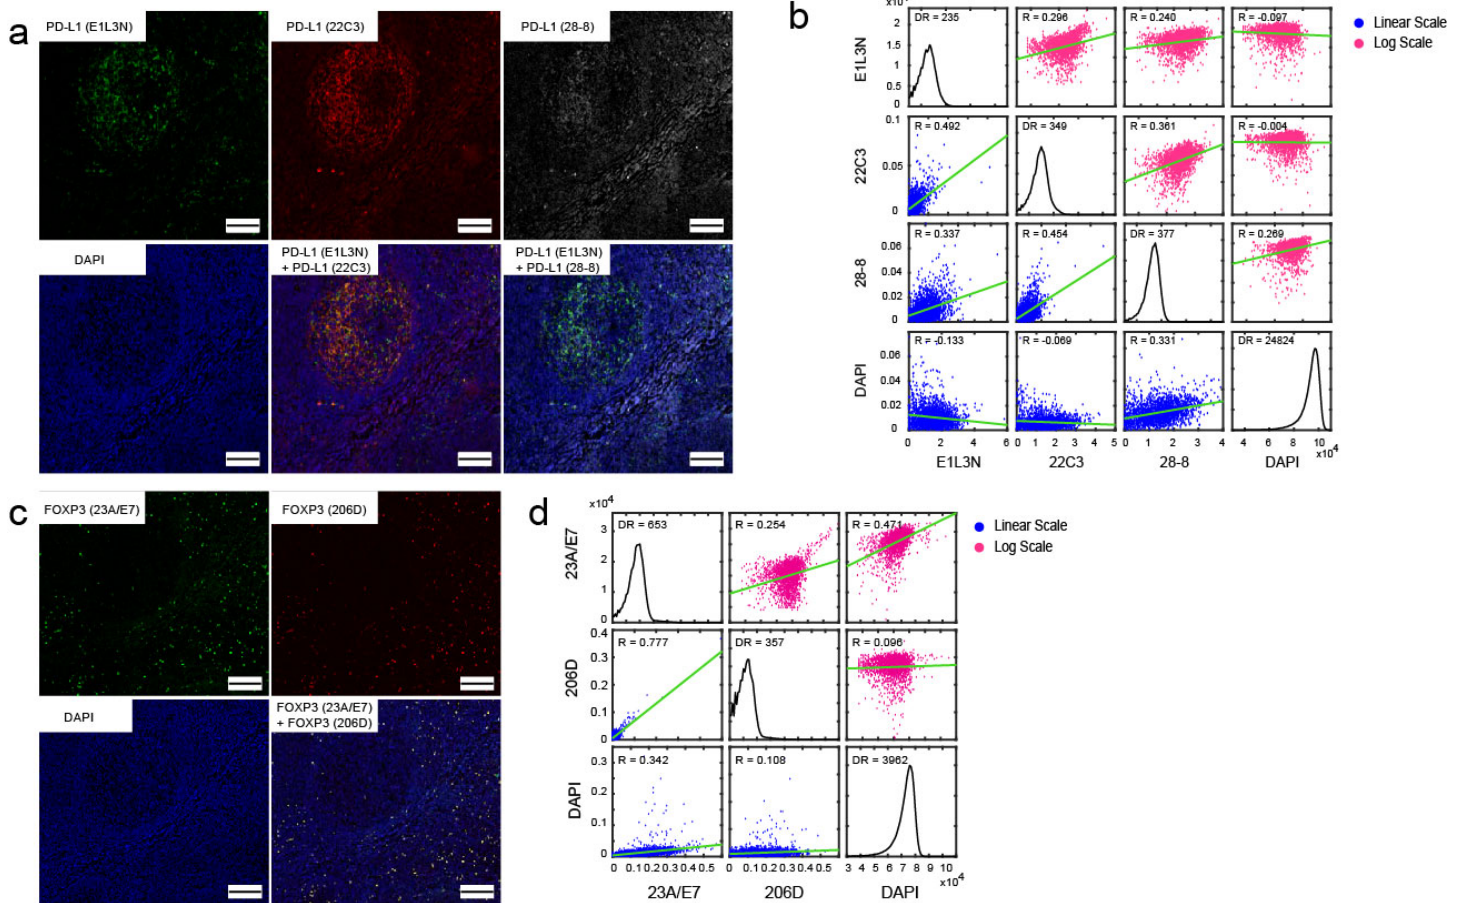

## Supplementary Figure 2

Multi-antibody qualification of PD-L1 and FOXP3 antibodies by t-CyCIF in human FFPE tonsil tissue.

Representative images of immunofluorescence staining from human FFPE tonsil sections using a) three different antibodies for PD-L1: E1L3N, CST; 22C3, DAKO; and 28-8, Abcam (Scale bars: 100  $\mu\text{m}$ ). b) Plots of the pixel-by-pixel correlation of the signal intensity generated by the various PD-L1 antibodies. c) Immunofluorescence staining with two different antibodies for FOXP3: 23A/E7, eBioscience; and 206D, BioLegend (Scale bars: 100  $\mu\text{m}$ ). d) Plots of the pixel-by-pixel correlation of the signal intensity generated by the various FOXP3 antibodies. The plots in b and d display the correlation of a random sampling of 2,000 pixels. The plots on the lower left (with blue dots) show the original fluorescence intensity at each pixel, and the plots on the upper right (with cyan dots) show the log-transformed fluorescence intensity at each pixel. The Pearson correlation coefficients (R) are shown. DR, dynamic range. The dynamic range and correlation values from 5 different regions are presented in Supplementary Table 1.

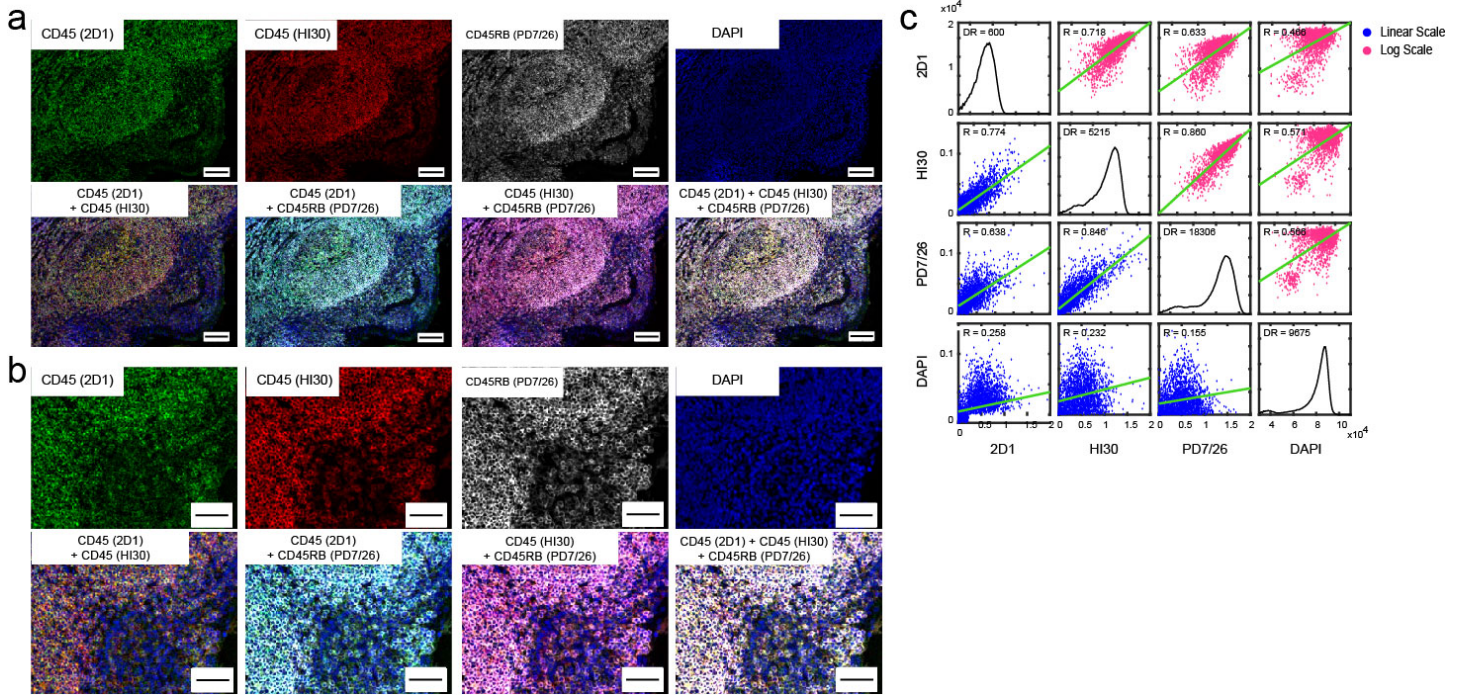

### Supplementary Figure 3

Multi-antibody qualification of CD45 antibodies by t-CyCIF in human FFPE tonsil tissue.

Individual and merged a) low (Scale bars: 100  $\mu$ m) and b) high (Scale bars: 50  $\mu$ m) magnification images of immunofluorescence from three CD45 antibodies: 2D1, R&D; HI30, BioLegend; and PD7/26, eBioscience. c) Plots of the pixel-by-pixel correlation of the signal intensity generated by these CD45 antibodies. The plots display the correlation of a random sampling of 2,000 pixels. The plots on the lower left (with blue dots) show the original fluorescence intensity at each pixel, and the plots on the upper right (with cyan dots) show the log-transformed fluorescence intensity at each pixel. The Pearson correlation coefficients (R) are shown. DR, dynamic range. The dynamic range and correlation values from 5 different regions are presented in Supplementary Table 1.

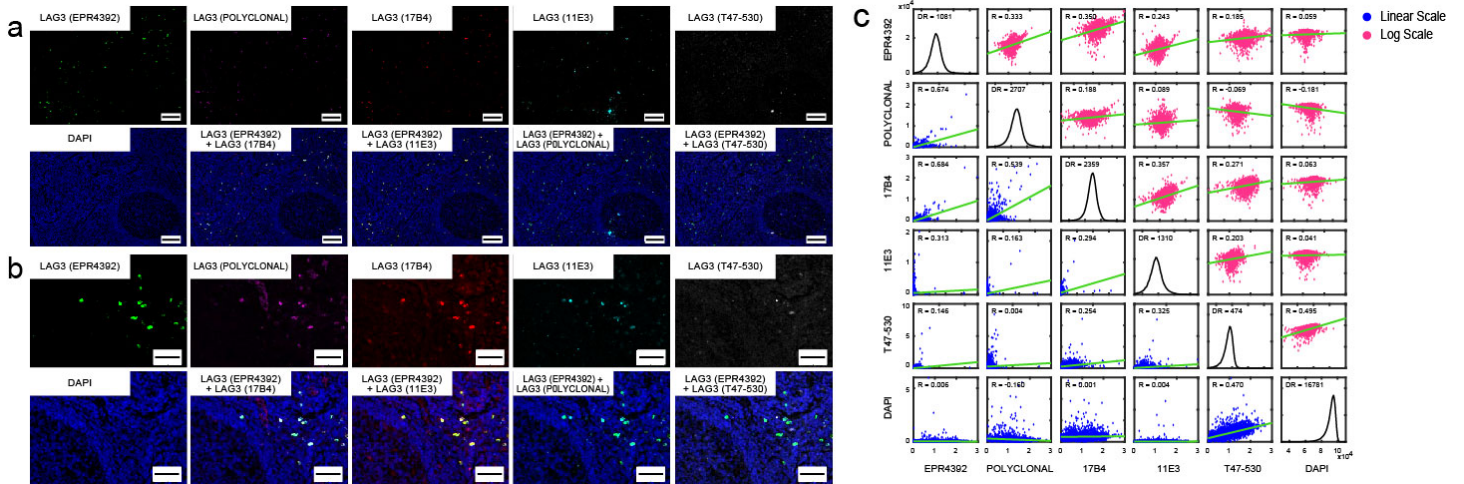

#### Supplementary Figure 4

Multi-antibody qualification of LAG3 antibodies by t-CyCIF in human FFPE tonsil tissue.

Individual and merged a) low (Scale bars: 100  $\mu$ m) and b) high (Scale bars: 50  $\mu$ m) magnification images of immunofluorescence from five LAG3 antibodies: EPR4392, Abcam; Polyclonal, R&D; 17B4, Lifespan; 11E3, Abcam; and T47-530, BD Bioscience. c) Plots of the pixel-by-pixel correlation of the signal intensity generated by the various LAG3 antibodies. The plots display the correlation of a random sampling of 2,000 pixels. The plots on the lower left (with blue dots) are of the original fluorescence intensity at each pixel, and the plots on the upper right (with cyan dots) are of the log-transformed fluorescence intensity at each pixel. The Pearson correlation coefficients (R) are shown. DR, dynamic range. The dynamic range and correlation values from 5 different regions are presented in Supplementary Table 1.

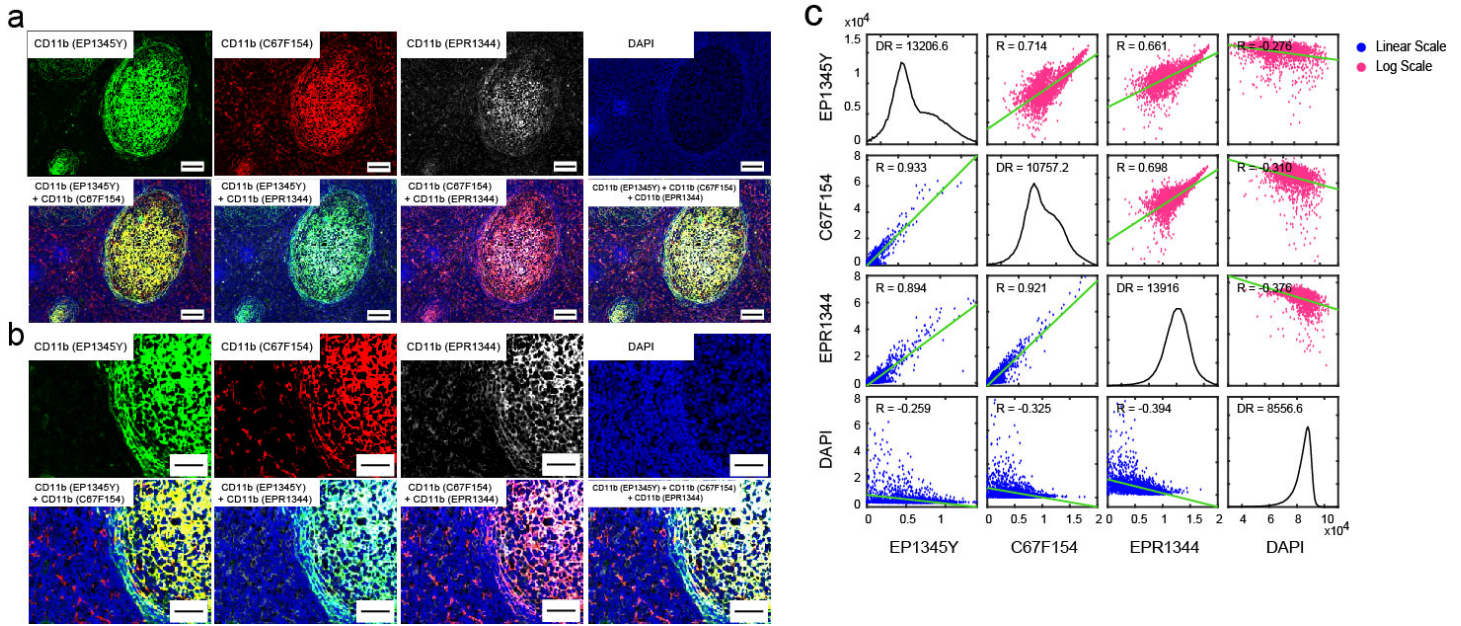

## Supplementary Figure 5

Multi-antibody qualification of CD11b antibodies by t-CyCIF in human FFPE tonsil tissue.

Individual and merged a) low (Scale bars: 100  $\mu\text{m}$ ) and b) high (Scale bars: 50  $\mu\text{m}$ ) magnification images of immunofluorescence from three CD11b antibodies: EP1345Y, Abcam; C67F154, eBioscience; and EPR1344, Abcam. c) Plots of the pixel-by-pixel correlation of the signal intensity generated by the CD11b antibodies. The plots display the correlation of a random sampling of 2,000 pixels. The plots on the lower left (with blue dots) show the original fluorescence intensity at each pixel, and the plots on the upper right (with cyan dots) show the log-transformed fluorescence intensity at each pixel. The Pearson correlation coefficients (R) are shown. DR, dynamic range. The dynamic range and correlation values from 5 different regions are presented in Supplementary Table 1.

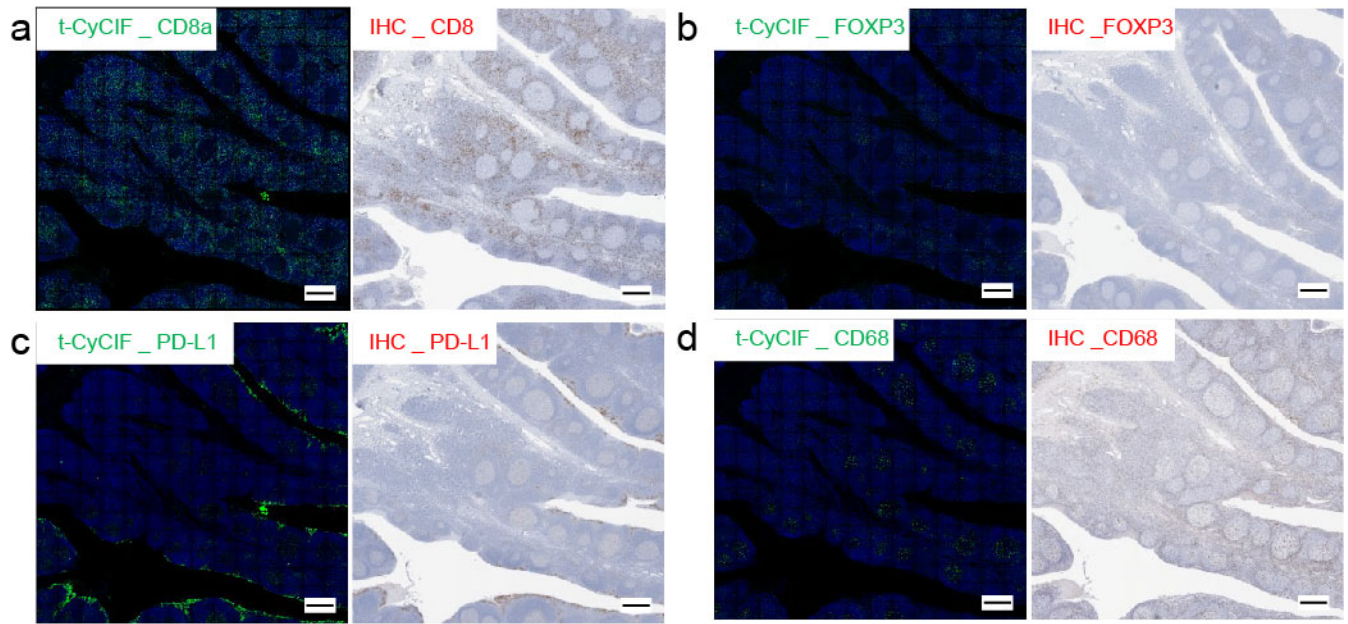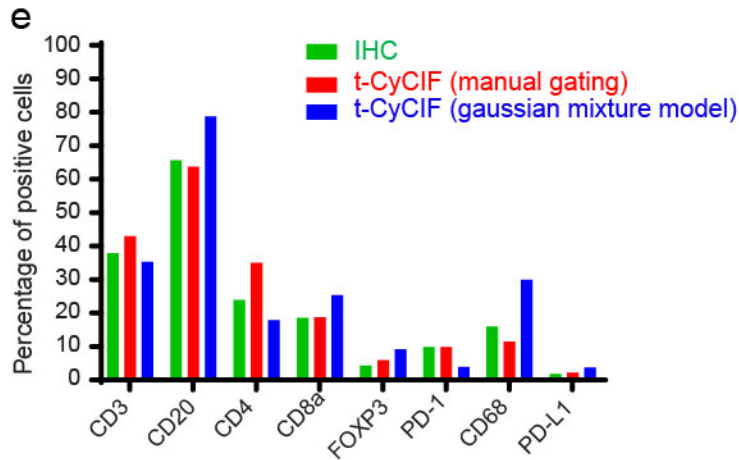

### Supplementary Figure 6

Multi-antibody qualification by t-CyCIF and IHC in human FFPE tonsil tissue.

Representative images of t-CyCIF (left) and IHC staining (right) using antibodies to a) CD8a, b) FOXP3, c) PD-L1, and d) CD68 (Scale bars: 500  $\mu$ m). e) Bar plot of the percentage of total immune cells in the tonsil section that were positive for the specified antibodies. The estimated number of positive cells was determined by both manual gating and by GMM analysis. The plot includes the percentage of positive cells for each immune antibody by IHC, as counted using Aperio ImageScope software.

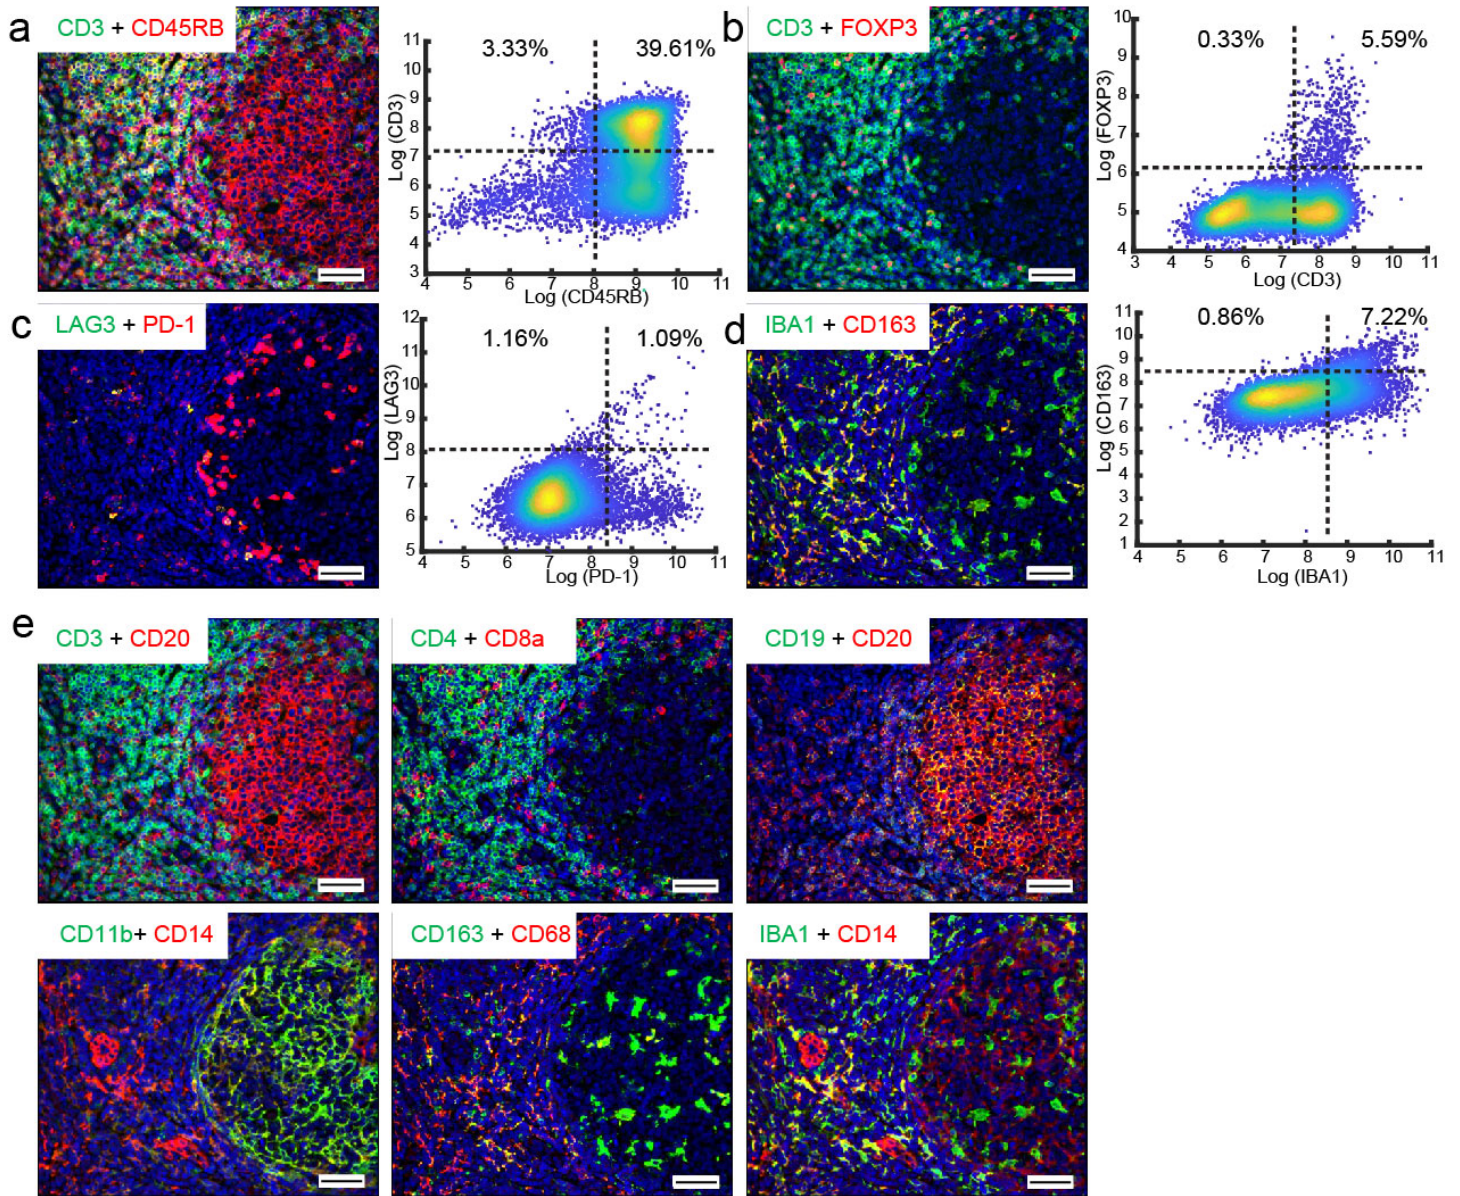

**Supplementary Figure 7**

Immune profiling in human FFPE tonsil tissue by t-CyCIF.

Merged images of t-CyCIF data (left) and scatter plots (right) from a random sampling of 10,000 cells for a) CD3 and CD45RB, b) CD3 and FOXP3, c) LAG3 and PD-1, and d) IBA1 and CD163. e) Additional merged images for CD3 and CD20, CD4 and CD8a, CD19 and CD20, CD11b and CD14, CD163 and CD68, and IBA1 and CD14 (Scale bars: 50  $\mu$ m).



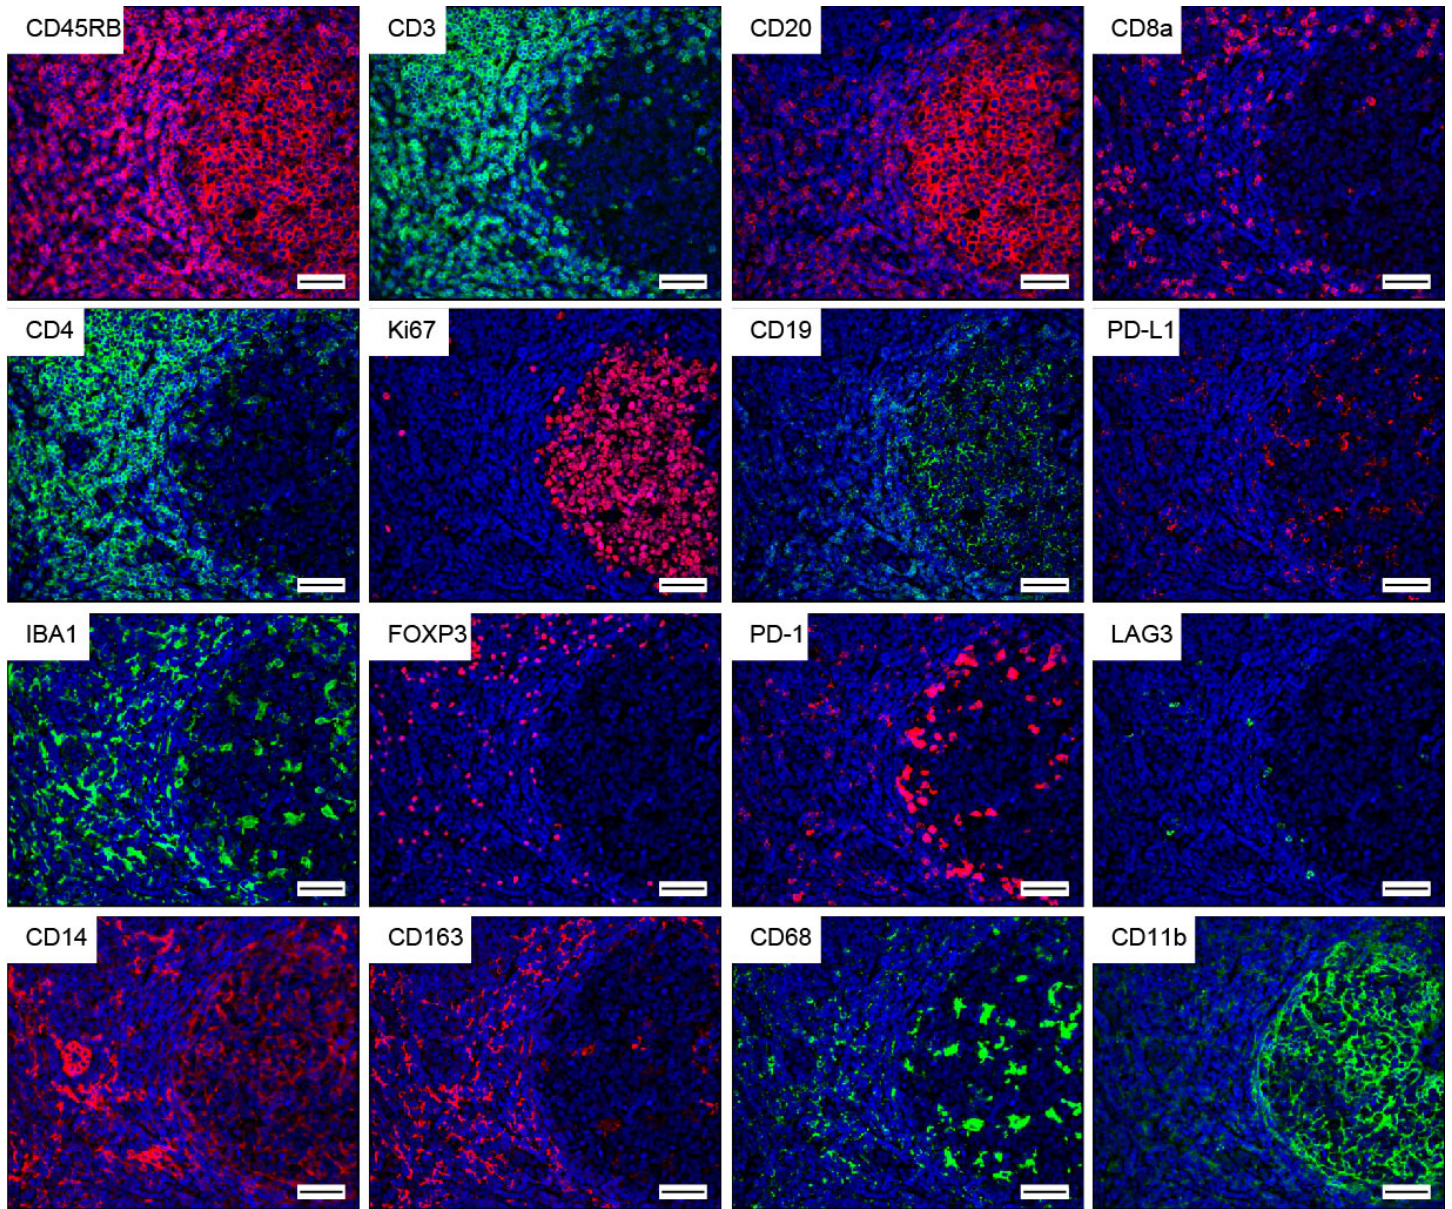

**Supplementary Figure 8**

Individual t-CyCIF images for 16 different immune markers in human FFPE tonsil tissue. Scale bars: 50  $\mu$ m.

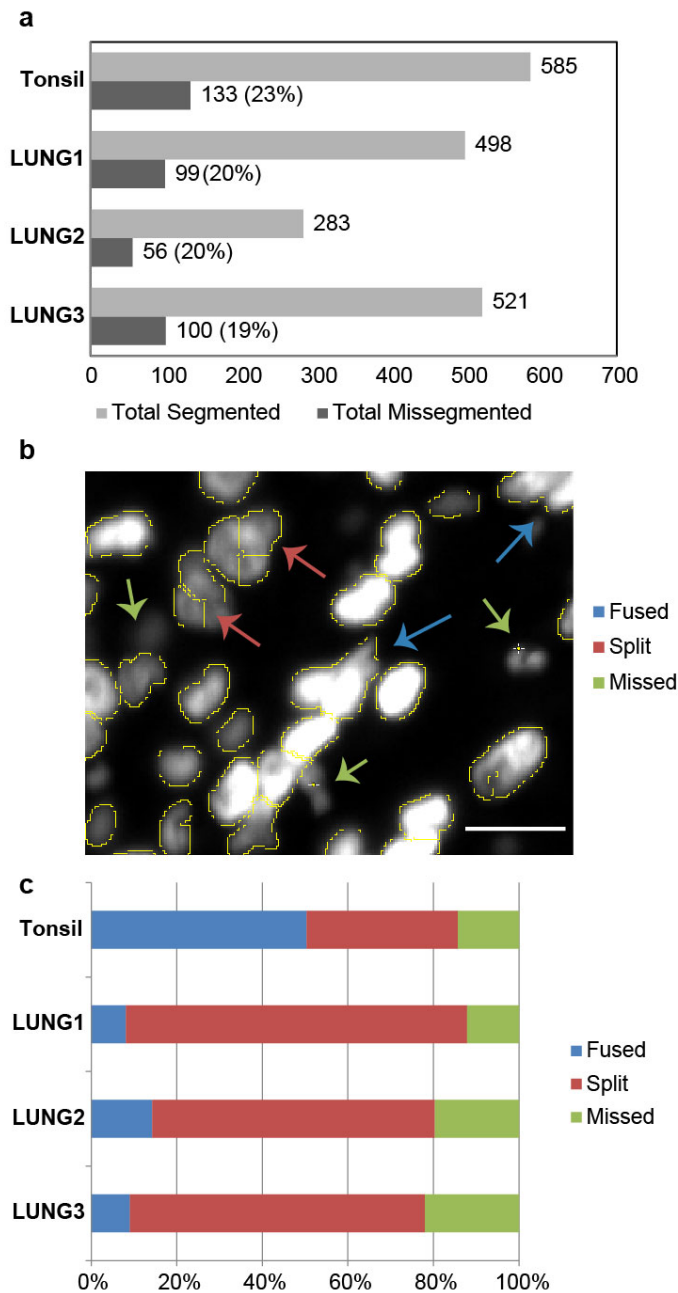

### Supplementary Figure 9

Evaluation of segmentation accuracy and error composition.

a) Overall error rates of segmentation. Several hundred segmented masks were validated by human review, and the errors versus total counts of segmented cells from four different samples (tonsil, LUNG-1-LN, LUNG-2-BR and LUNG-3-PR) are plotted here. The average error rate was ~20% (S.E. 2%) for each sample. b) Illustration of the types of errors encountered. An example single-channel grey-scale Hoechst image is shown, with segmented masks highlighted in yellow. Three major types of segmentation errors were found: fused (blue arrows), split (red arrows) and missed (green arrows) cells (Scale bar: 20  $\mu$ m). c) The composition of the different types of segmentation errors from the four samples.

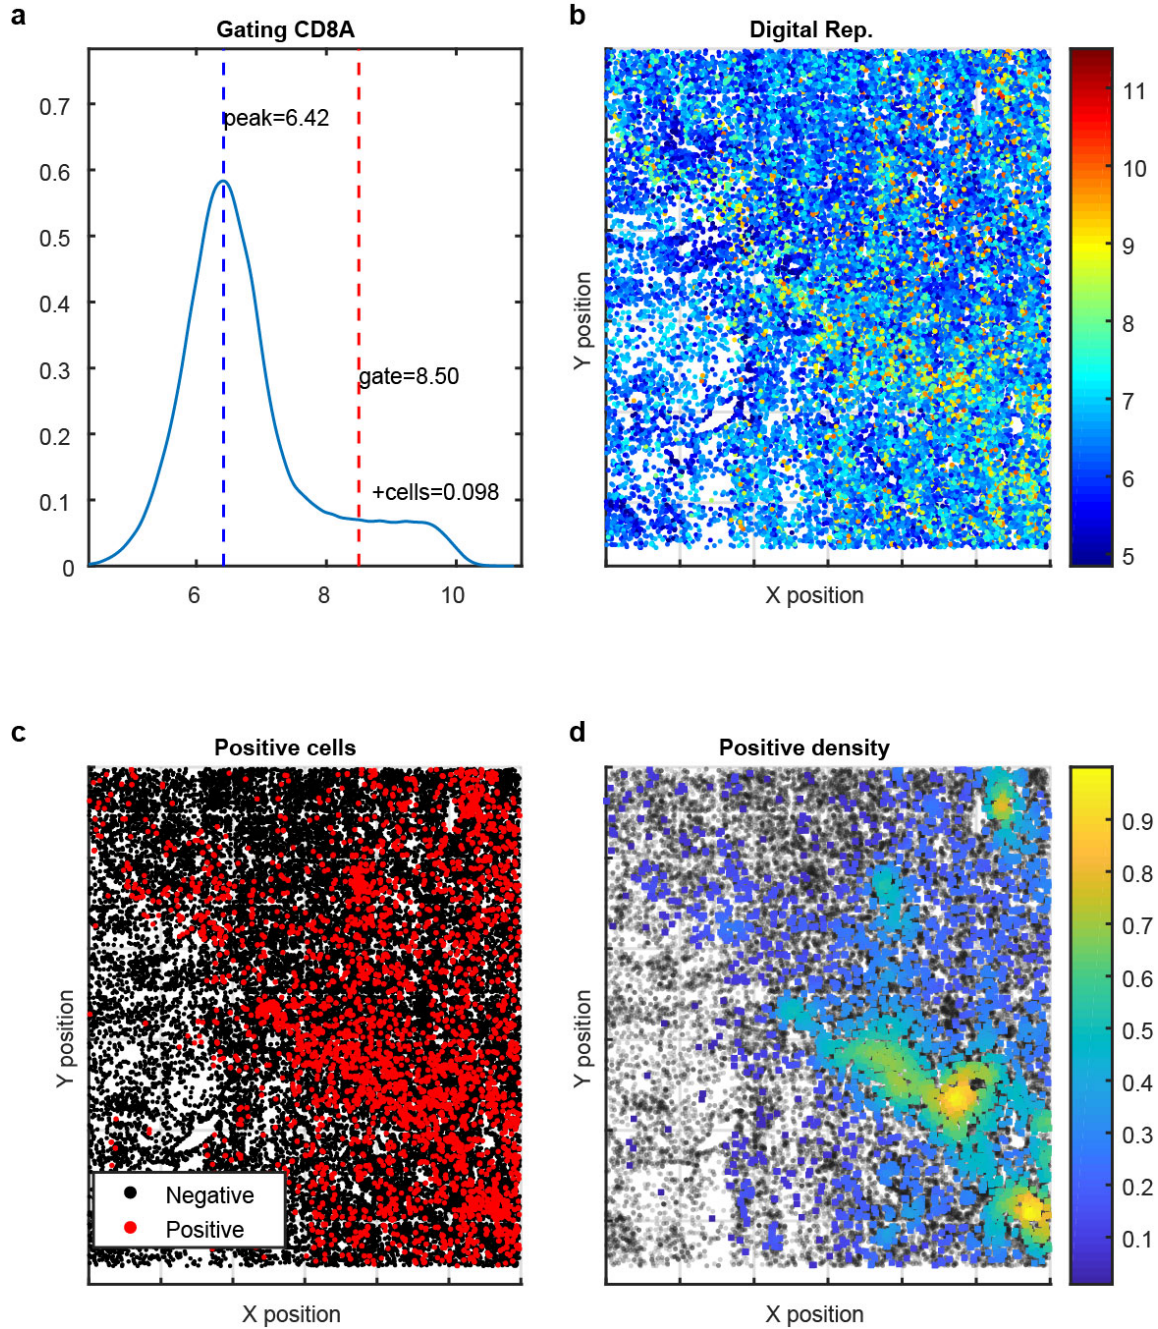

### Supplementary Figure 10

Illustration of manual inspection and gating of intensity data.

a) Histogram of single-cell intensity from CD8a staining in LUNG-3-PR. Human inspection of this signal profile was used to set the gate/threshold at 8.5 log. The digital representation of the same intensity data was projected into physical maps of b) the original intensity data in log scale, c) data with all positive cells coloured in red, and d) the relative density of positive cells.

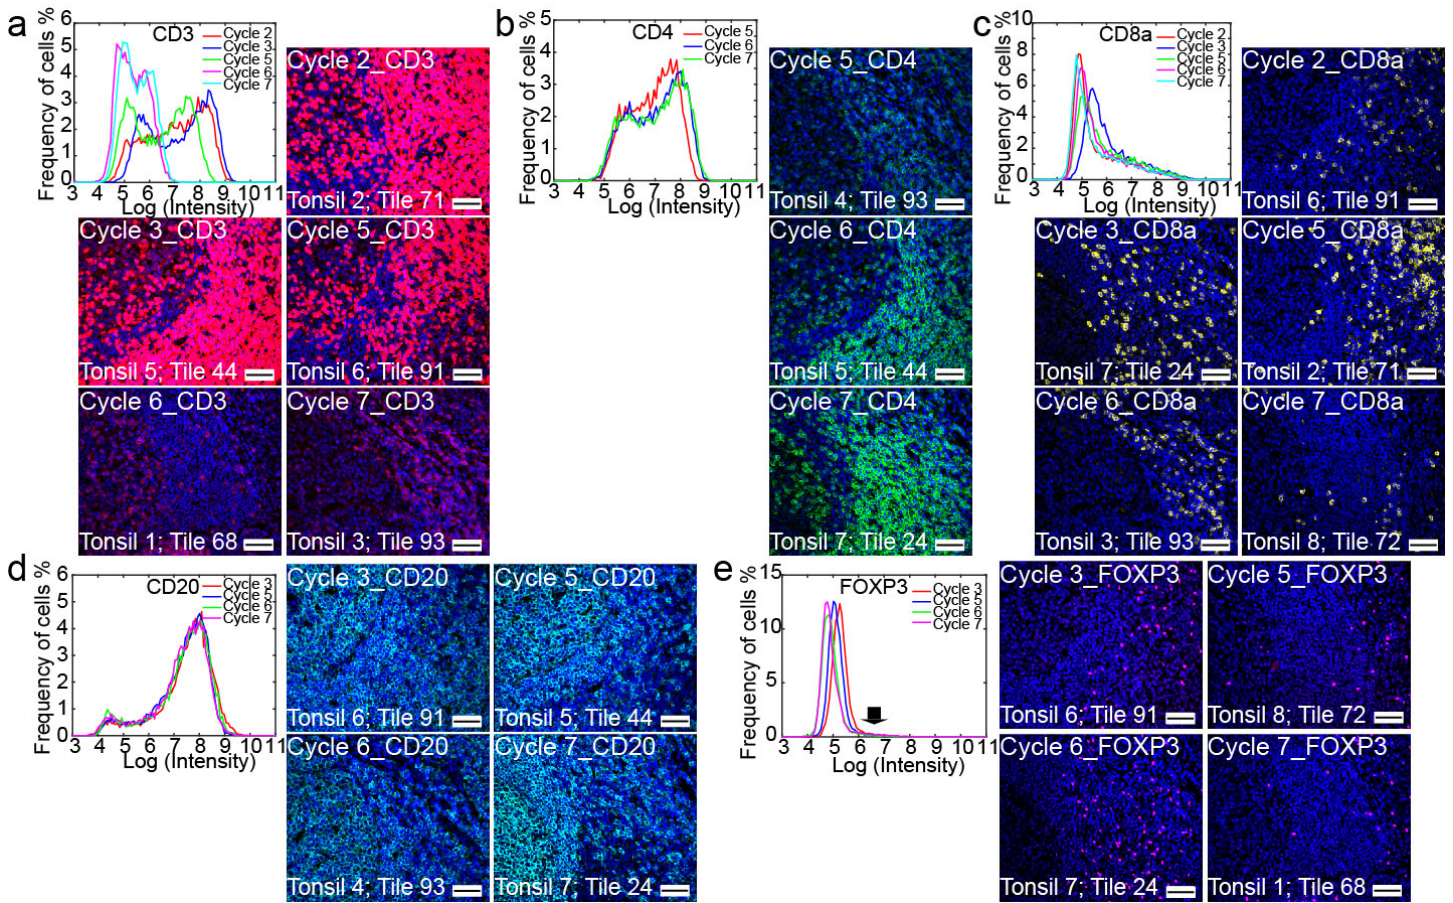

**Supplementary Figure 11**

Analysis of effect of t-CyCIF cycle number on antigenicity in human FFPE tonsil tissue.

Histograms of signal intensity (upper left) and representative images of t-CyCIF from eight sequential sections of human FFPE tonsil tissue across different staining cycles for a) CD3, b) CD4, c) CD8a, d) CD20, and e) FOXP3. The same antibody concentration and exposure time for imaging were used for each cycle (see Supplementary Table 5, 6 for additional details). The histogram plots were made from single cell data to show the intensity distribution from the different populations from different cycles. For the images shown, the same threshold was used for each marker for visualization and comparison. In e, the black arrow indicates the FOXP3+ population (Scale bars: 50  $\mu$ m).

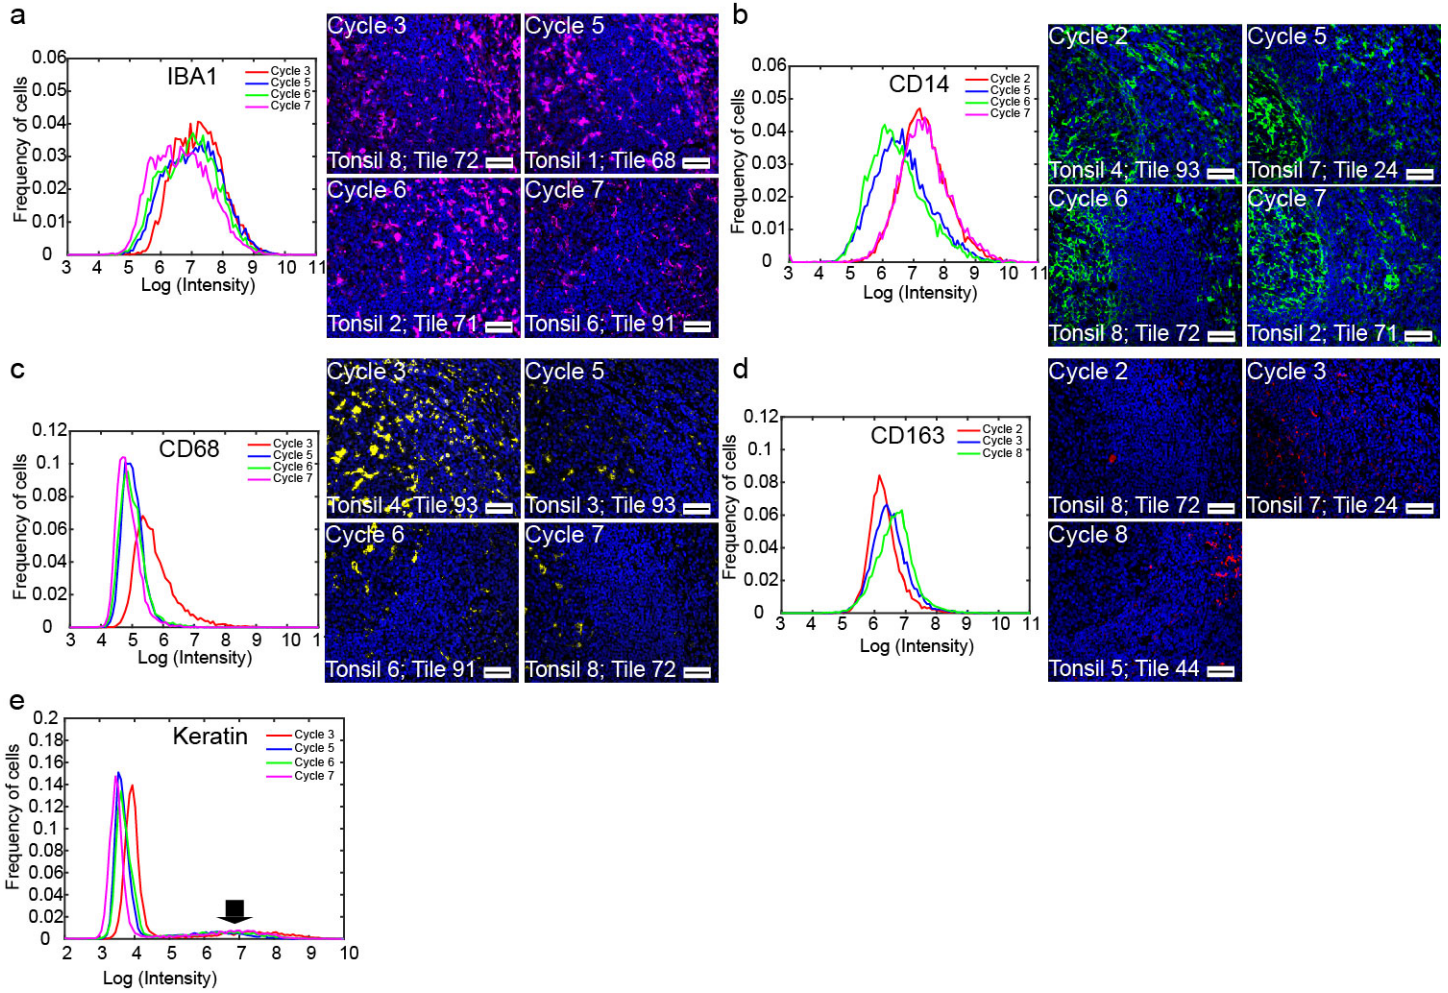

### Supplementary Figure 12

Analysis of effect of t-CyCIF cycle number on antigenicity in human FFPE tonsil tissue.

Histograms of signal intensity (upper left) and representative images of t-CyCIF from eight sequential sections of human FFPE tonsil tissue across different staining cycles for a) IBA1, b) CD14, c) CD68, d) CD163, and e) keratin. The same antibody concentration and exposure time for imaging were used in each cycle (see Supplementary Table 5, 6 for details). The histogram plots were made from single cell data to show the intensity distribution from the different populations from different cycles. For the images shown, the same threshold was used for each marker for visualization and comparison. In e, the black arrow indicates the keratin+ population (Scale bars: 50  $\mu$ m).

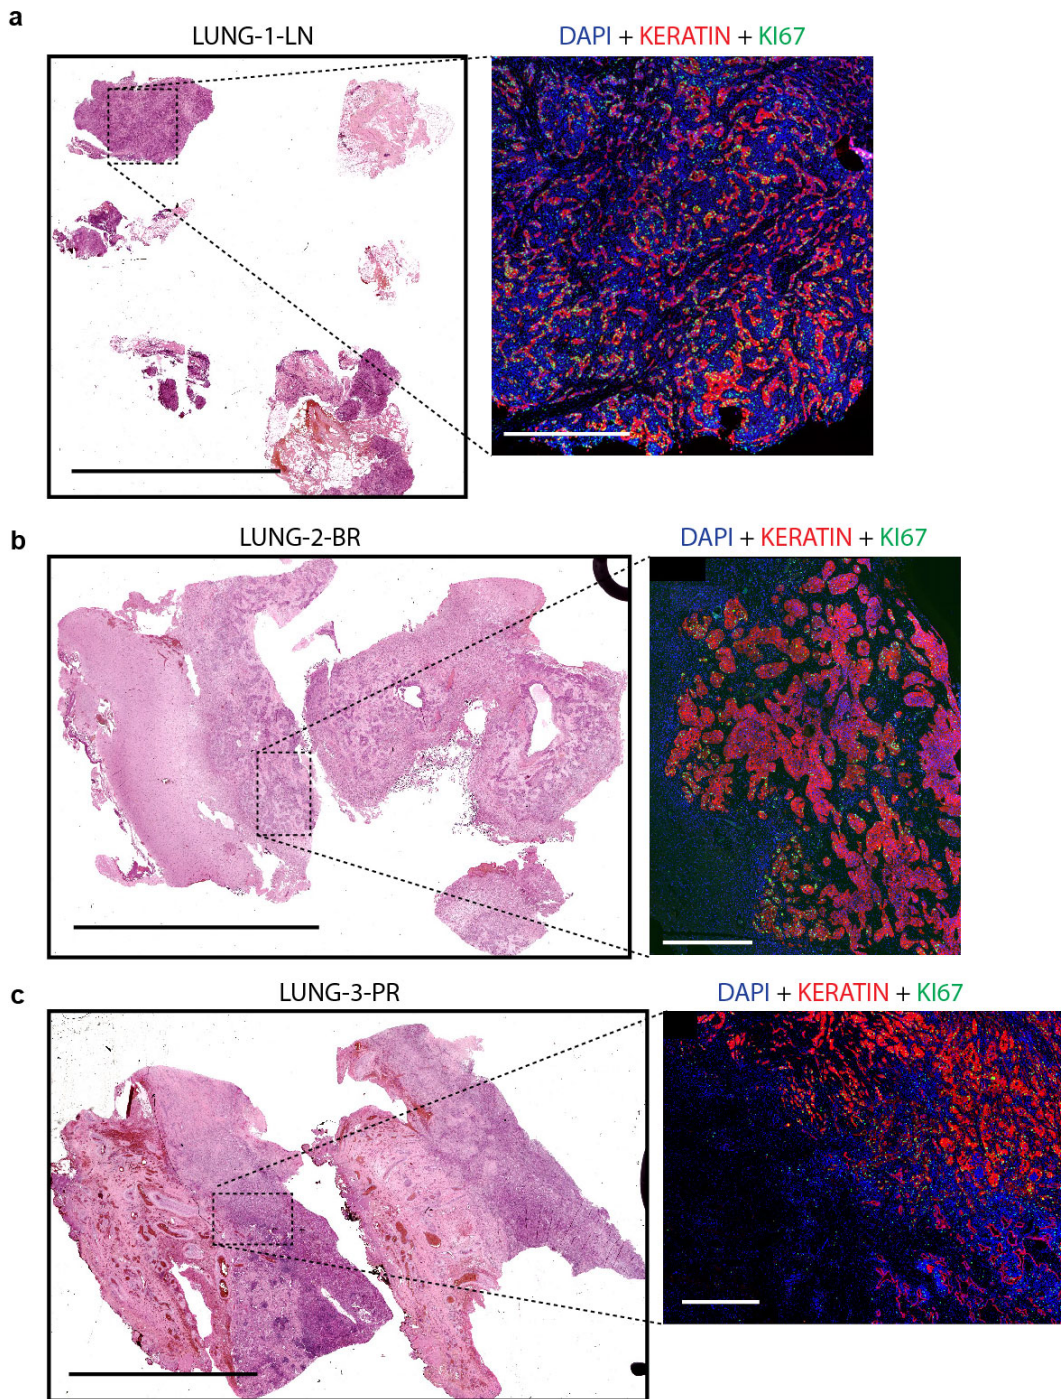

**Supplementary Figure 13**

H&E images of lung cancer specimens.

Whole slide scans of H&E-stained slides (left) and t-CyCIF images (right) from a) lung adenocarcinoma metastasis to the lymph node (LUNG-1-LN), b) lung squamous cell carcinoma metastasis to the brain (LUNG-2-BR), and c) primary lung squamous cell carcinoma (LUNG-3-PR) (Scale bars: 15 mm in H&E images; 1 mm in t-CyCIF images).

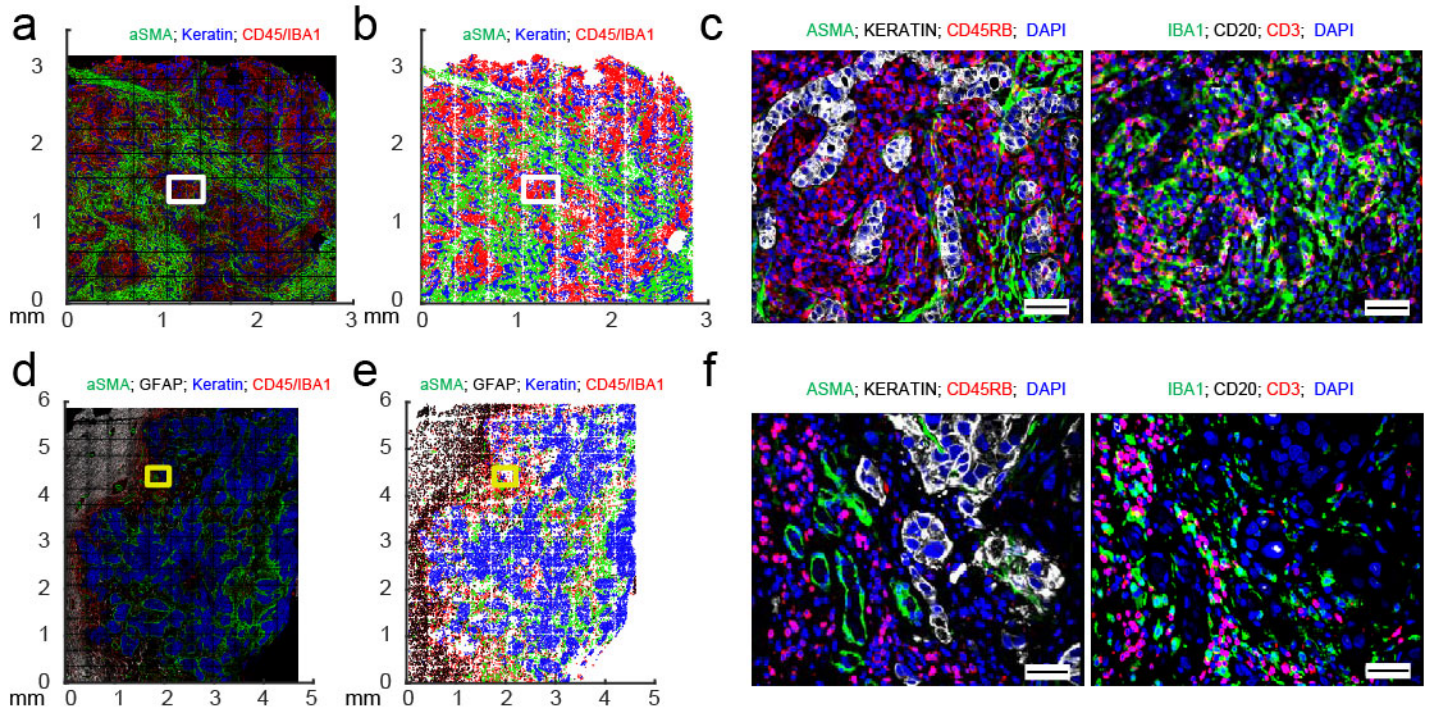

#### Supplementary Figure 14

Geographic visualization of t-CyCIF data in LUNG-1-LN and LUNG-2-BR.

a) Montage of t-CyCIF images and b) corresponding dot plot for tumour cells (keratin+, blue), fibroblasts ( $\alpha$ -SMA+, green) and immune cells (CD45+ or IBA1+, red) in LUNG-1-LN. c) Representative merged images of t-CyCIF data for  $\alpha$ -SMA, keratin, CD45RB, IBA1, CD20, and CD3 from LUNG-1-LN (Scale bars: 50  $\mu$ m). d) Montage of t-CyCIF images and e) corresponding dot plot for tumour cells (keratin+, blue), fibroblasts ( $\alpha$ -SMA+, green) and immune cells (CD45+ or IBA1+, red) in LUNG-2-BR. f) Representative merged images of t-CyCIF data for  $\alpha$ -SMA, keratin, CD45RB, IBA1, CD20, and CD3 from LUNG-2-BR (Scale bars: 50  $\mu$ m).

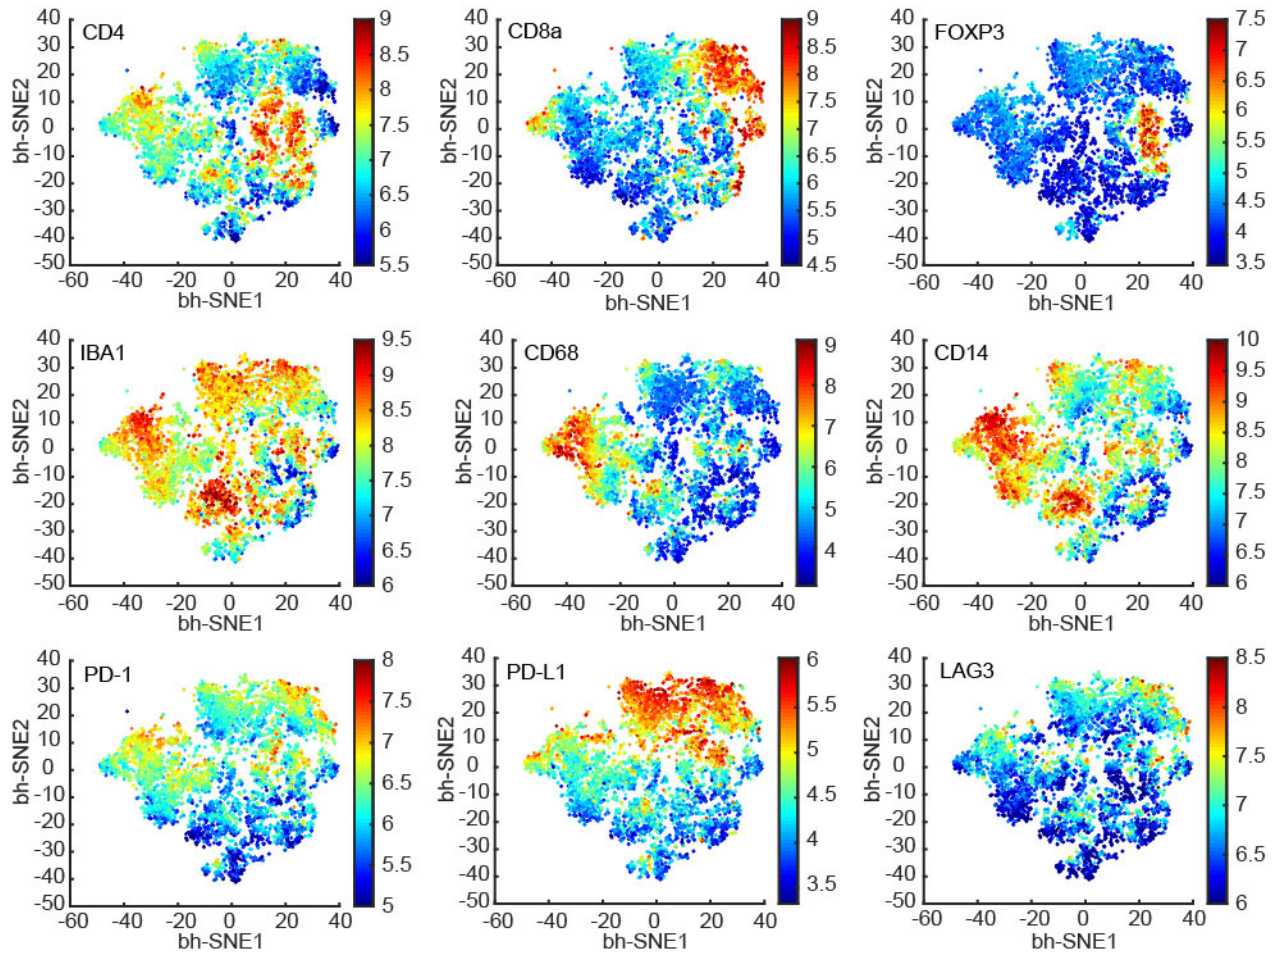

**Supplementary Figure 15**

t-SNE analysis of immune cells from lung cancer samples.

t-SNE plots of immune cell markers CD4, CD8a, FOXP3, IBA1, CD68, CD14, PD-1, PD-L1 and LAG3 from a random sampling of 2,000 immune cells for LUNG-1-LN, LUNG-2-BR and LUNG-3-PR. The staining for each of the indicated markers is mapped by colour (red = high, blue = low).



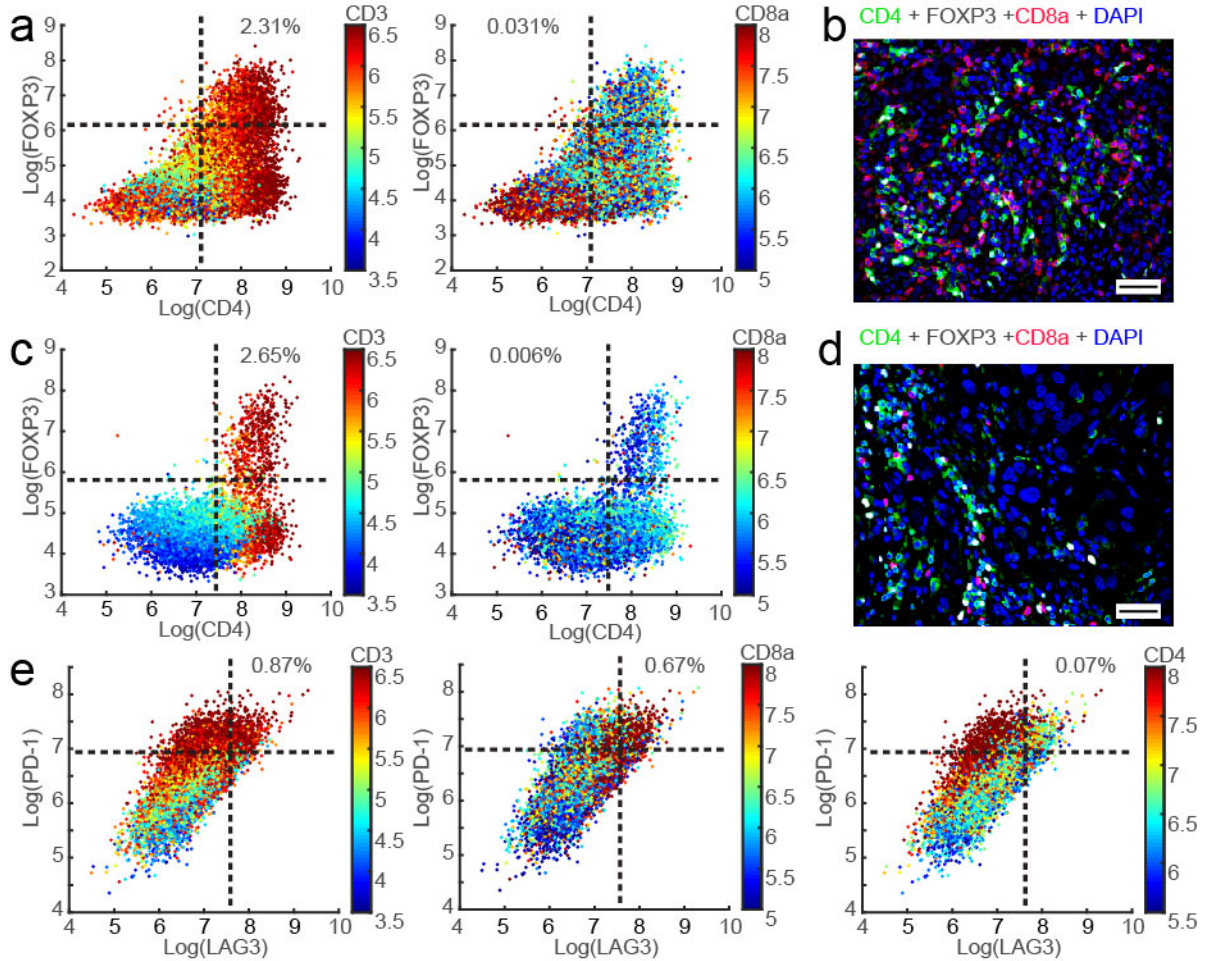

### Supplementary Figure 16

Low-frequency immune cell types detected and confirmed by t-CyCIF in LUNG-1-LN and LUNG-2-BR.

a) Scatter plots of CD4 and FOXP3 expression in LUNG-1-LN, with CD3 and CD8a expression mapped by colour (red = high, blue = low). 2.31% of the immune cells were CD45+/CD3+/FOXP3+/CD4-/CD8a-, while 0.031% of the immune cells were CD45+/CD3+/FOXP3+/CD4-/CD8a+. b, Representative image of t-CyCIF data for CD4, CD8a and FOXP3 in LUNG-1-LN (Scale bar: 50  $\mu$ m). c. Scatter plots for CD4 and FOXP3, with CD3 and CD8a mapped as in panel a in LUNG-2-BR. 2.65% of the immune cells were CD45+/CD3+/FOXP3+/CD4-/CD8a- while 0.006% of the immune cells were CD45+/CD3+/FOXP3+/CD4-/CD8a+. d) Merged image of t-CyCIF data for CD4, CD8a and FOXP3 in LUNG-2-BR (Scale bar: 50  $\mu$ m). e) Scatter plots for LAG3 and PD-1 expression in LUNG-1-LN, with CD3 and CD8a expression mapped as in panel a. 3.6% of immune cells were CD45+/CD3+/PD-1+, 0.87% were CD45+/CD3+/PD-1+/LAG3+ cells, 0.67% were CD45+/CD3+/ PD-1+/LAG3+/ CD4-/CD8a+, and 0.07% were CD45+/CD3+/PD-1+/LAG3+/ CD4+/CD8a-. See Supplementary Table 8 for additional details on these data.

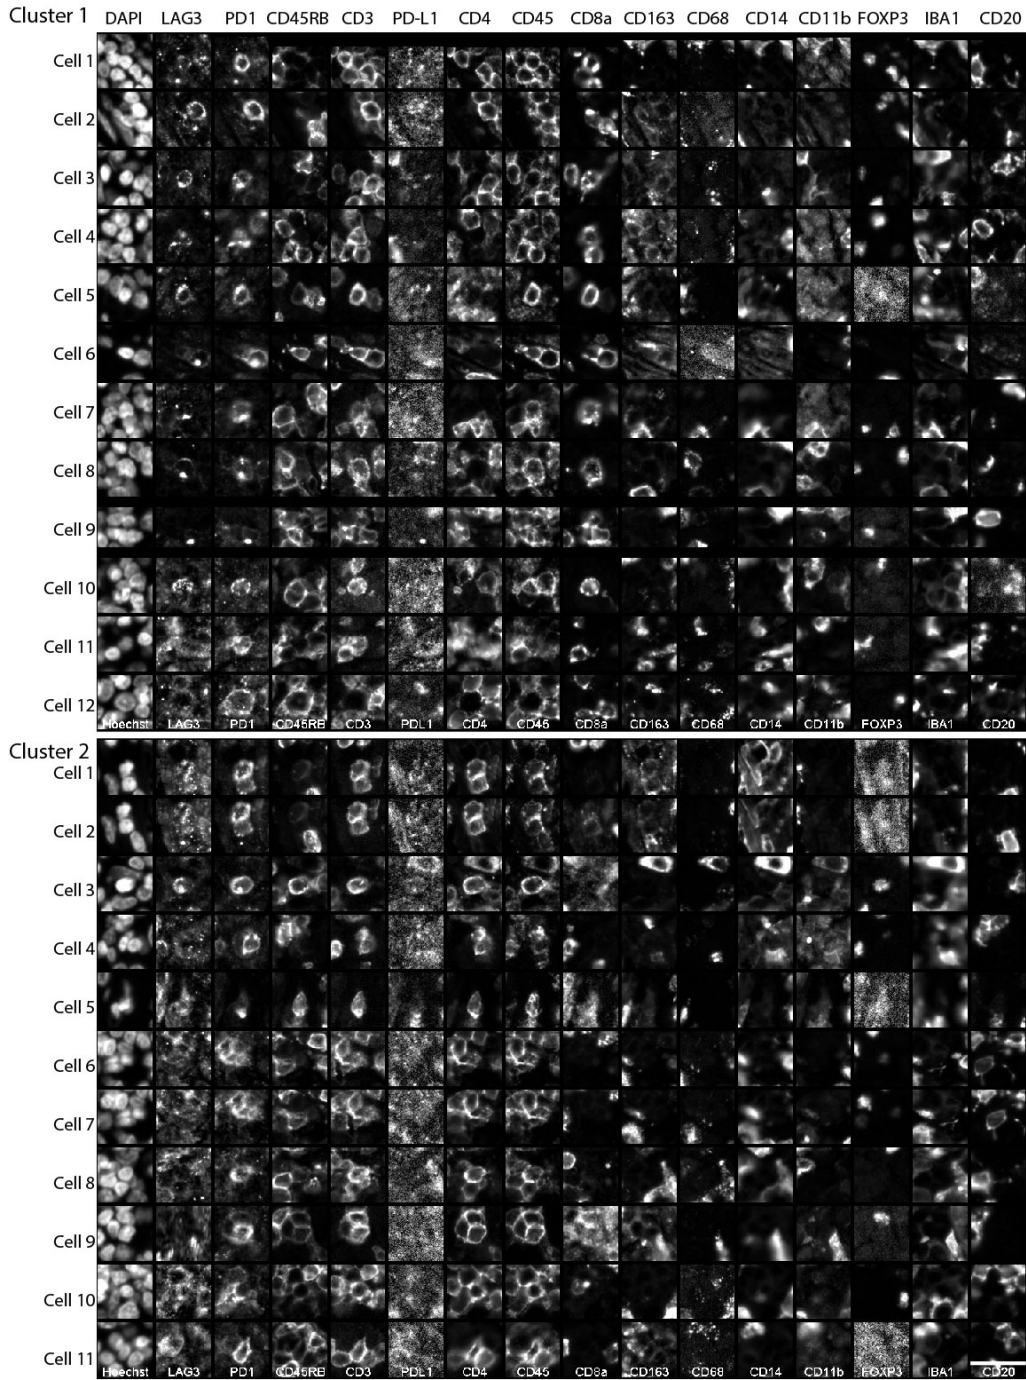

**Supplementary Figure 17**

Galleries of images of immune markers expressed in rare cell clusters 1 and 2.

Galleries of images of immune markers (LAG3, PD-1, CD45RB, CD3, PD-L1, CD4, CD45, CD8a, CD163, CD68, CD14, CD11b, FOXP3, IBA1, CD20) and DNA stain for 12 individual rare cells identified in cluster 1 using automated methods that putatively express CD45+/CD45RB+/CD3+/CD8a+/PD-1+ (top) or 11 individual rare cells in cluster 2 that putatively express CD45+/CD45RB+/CD3+/CD4+/PD-1+ (bottom) (Scale bar: 25  $\mu$ m). Supplementary Table 10 indicates whether visual review of these images by a trained pathologist was deemed to be consistent with the automated calls.

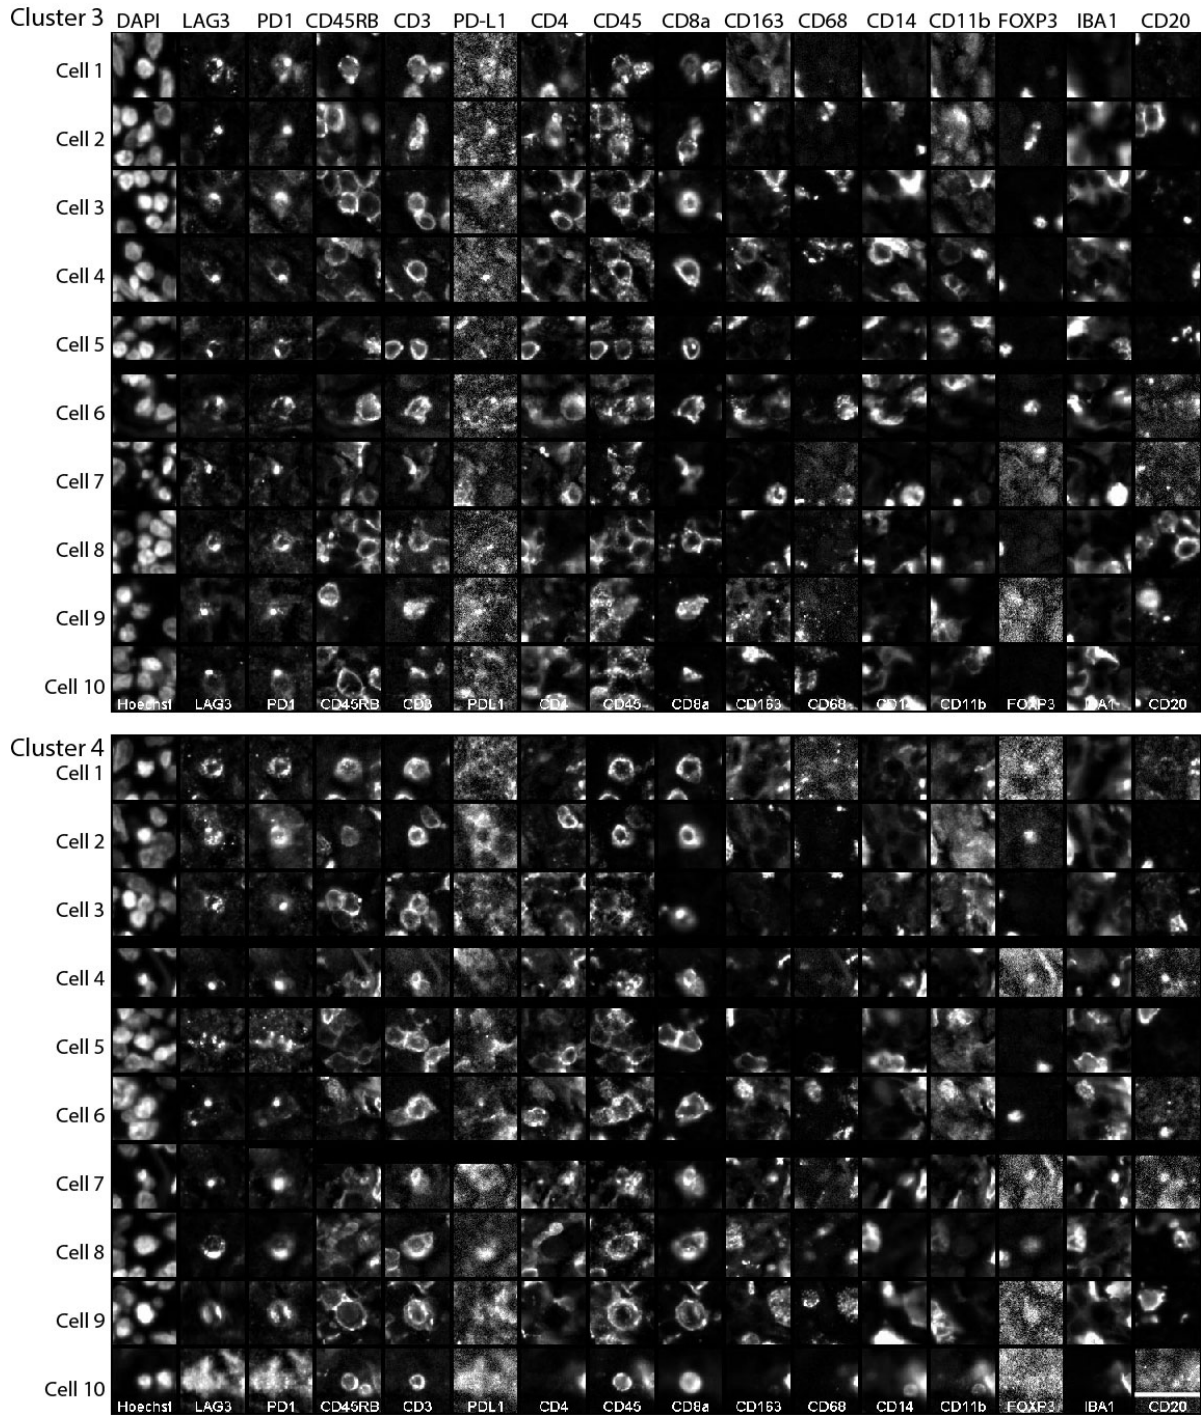

**Supplementary Figure 18**

Galleries of images of immune markers expressed in rare cell clusters 3 and 4.

Galleries of images of immune markers (LAG3, PD-1, CD45RB, CD3, PD-L1, CD4, CD45, CD8a, CD163, CD68, CD14, CD11b, FOXP3, IBA1, CD20) and DNA stain for 10 individual rare cells in cluster 3 identified using automated methods that putatively express CD45+/CD45RB+/CD3+/CD8a+/PD-1+/LAG3+ (top), or 10 individual rare cells in cluster 4 that putatively express CD45+/CD45RB+/CD3+/CD8a+/PD-1+/LAG3+/PD-L1+ (bottom) (Scale bar: 25 µm). Supplementary Table 10 indicates whether visual review of these images by a trained pathologist was deemed to be consistent with the automated calls.

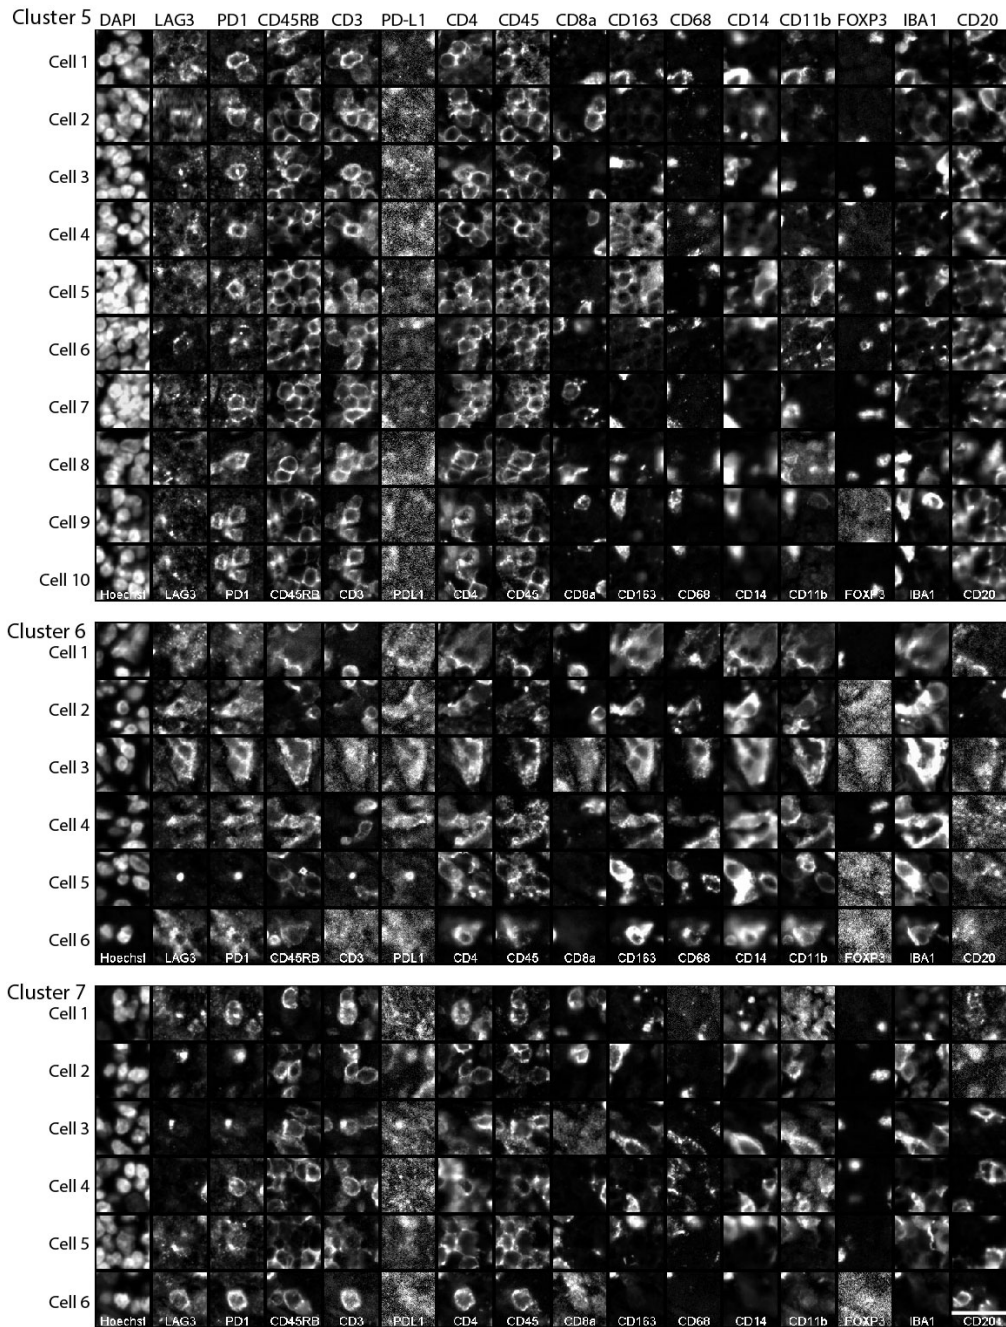

### Supplementary Figure 19

Galleries of images of immune markers expressed in rare cell clusters 5, 6, and 7.

Galleries of images of immune markers (LAG3, PD-1, CD45RB, CD3, PD-L1, CD4, CD45, CD8a, CD163, CD68, CD14, CD11b, FOXP3, IBA1, CD20) and DNA stain for 10 individual rare cells in cluster 5 identified using automated methods that putatively express CD45+/CD45RB+/CD3+/CD4+/CD20+/PD-1+ (top), 6 individual rare cells in cluster 6 that putatively express CD45+/CD45RB+/IBA1+/CD163+/CD14+/CD68+/CD11b+/PD-1+/LAG3+/PD-L1+ (middle), or 6 individual rare cells in cluster 7 that putatively express CD45+/CD45RB+/CD3+/PD-1+ (Scale bar: 25  $\mu$ m). Supplementary Table 10 indicates whether visual review of these images by a trained pathologist was deemed to be consistent with the automated calls.

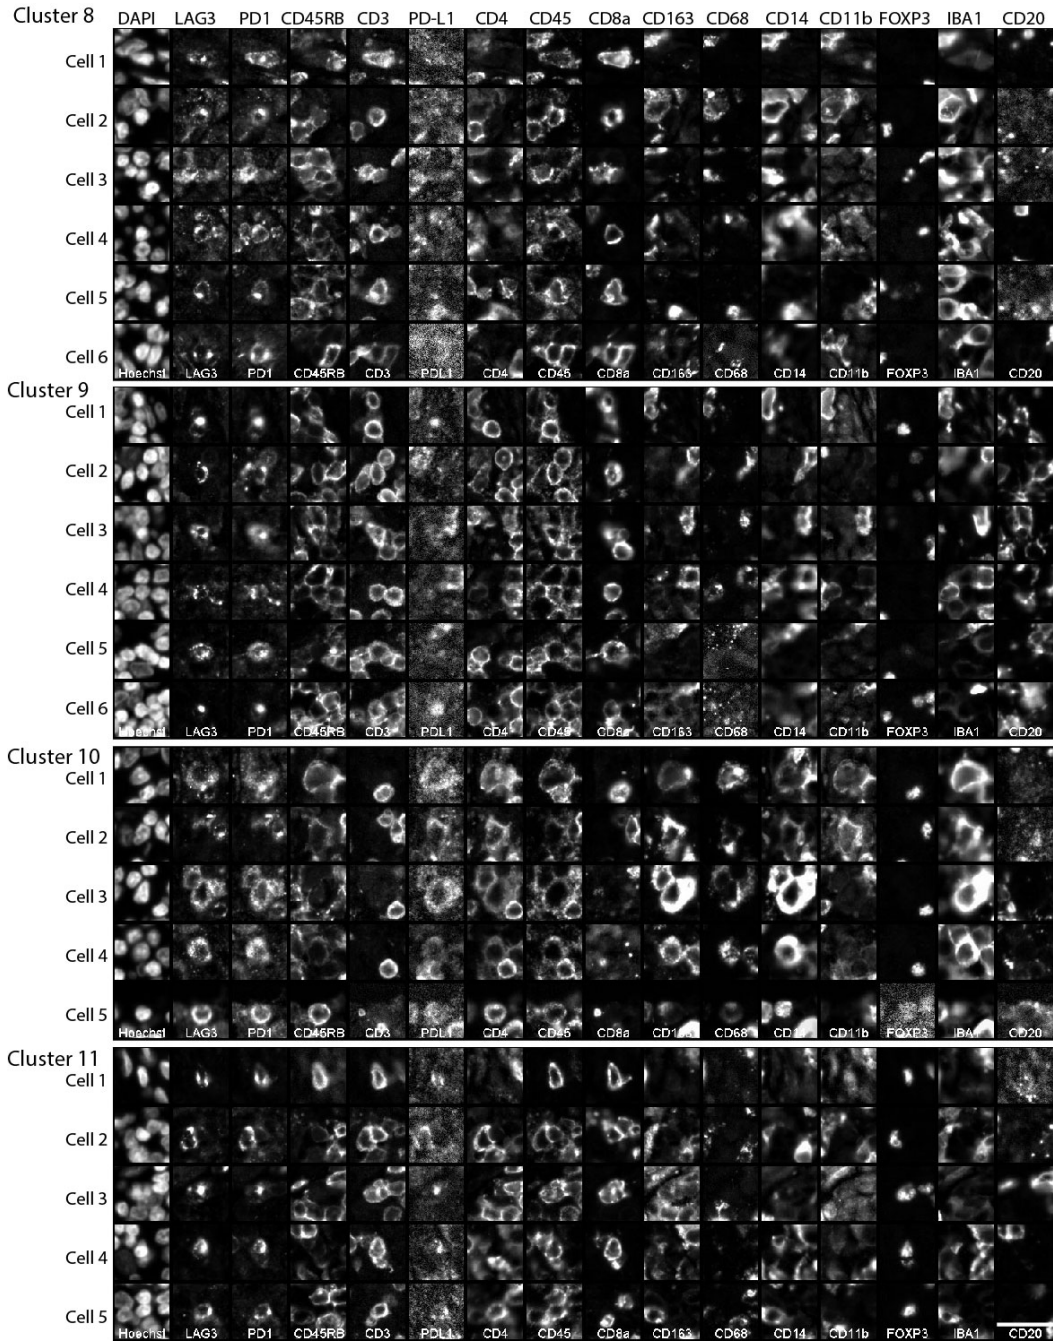

**Supplementary Figure 20**

Galleries of images of immune markers expressed in rare cell clusters 8, 9, 10, and 11.

Galleries of images of immune markers (LAG3, PD-1, CD45RB, CD3, PD-L1, CD4, CD45, CD8a, CD163, CD68, CD14, CD11b, FOXP3, IBA1, CD20) and DNA stain for 6 individual rare cells in cluster 8 identified using automated methods that putatively express CD45+/CD45RB+/CD3+/CD8a+/IBA1+/PD-1+, 6 individual rare cells in cluster 9 that putatively express CD45+/CD45RB+/CD3+/CD8a+/CD20+/PD-1+/LAG3+, 5 individual rare cells in cluster 10 that putatively express CD45+/CD45RB+/IBA1+/CD163+/CD14+/CD68+/PD-1+/LAG3+/PD-L1+, or 5 individual rare cells in cluster 11 that putatively express CD45+/CD45RB+/CD3+/CD8a+/FOXP3+/PD-1+/LAG3+ (Scale bar: 25  $\mu$ m). Supplementary Table 10 indicates whether visual review of these images by a trained pathologist was deemed to be consistent with the automated calls.

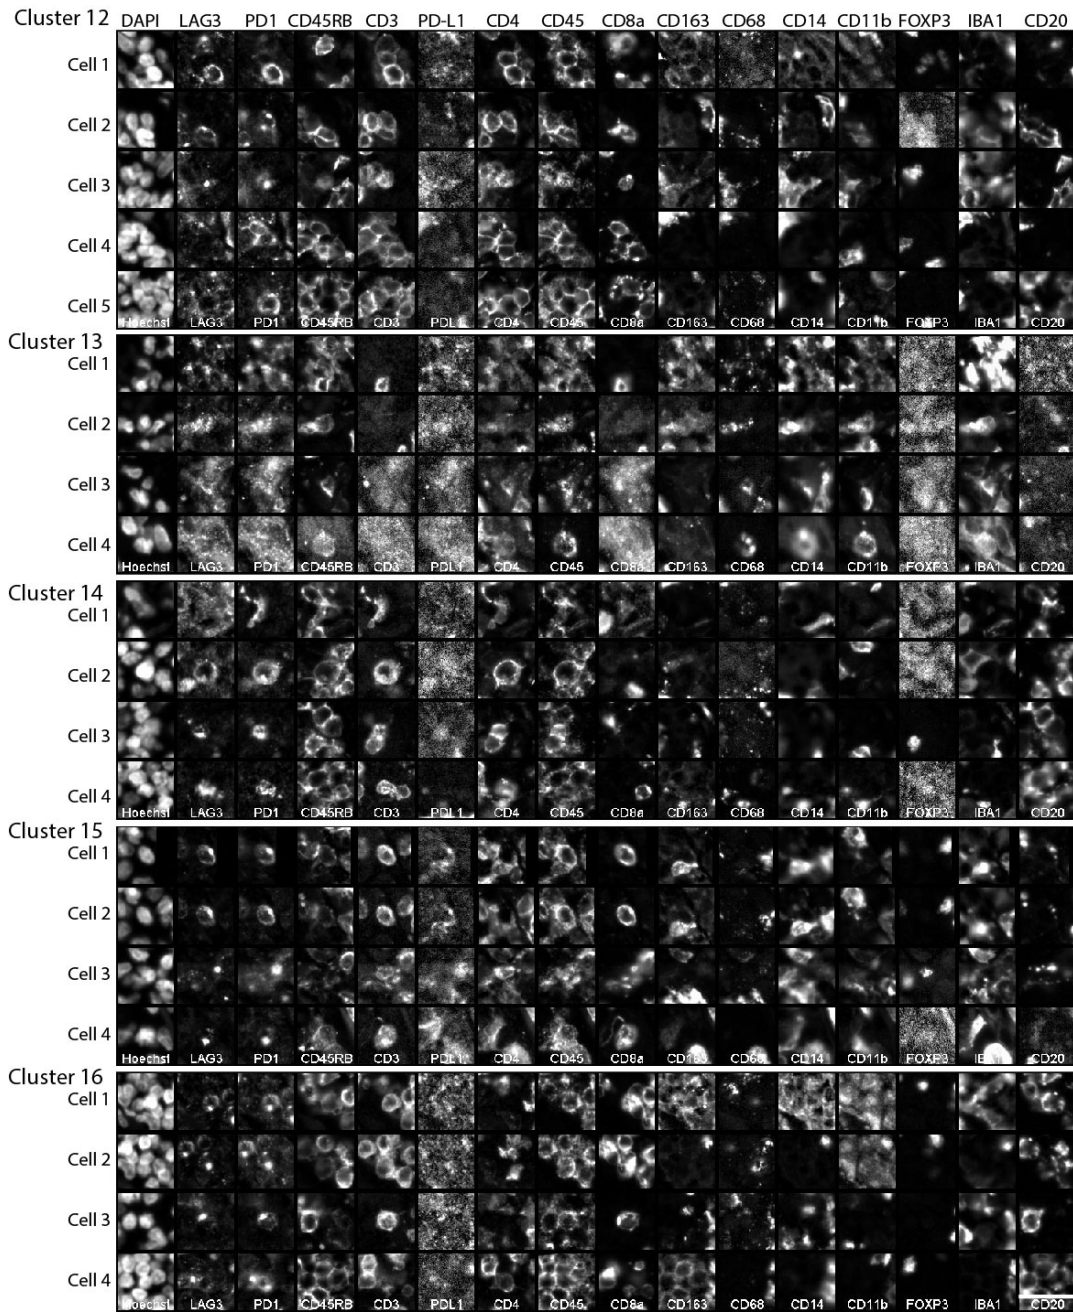

### Supplementary Figure 21

Galleries of images of immune markers expressed in rare cell clusters 12, 13, 14, 15, and 16.

Galleries of images of immune markers (LAG3, PD-1, CD45RB, CD3, PD-L1, CD4, CD45, CD8a, CD163, CD68, CD14, CD11b, FOXP3, IBA1, CD20) and DNA stain for 5 individual rare cells in cluster 12 identified using automated methods that putatively express CD45+/CD45RB+/CD3+/CD4+/CD8a+/PD-1+, 4 individual rare cells in cluster 13 that putatively express CD45+/CD45RB+/IBA1+/CD14+/CD11b+/PD-1+/LAG3+/PD-L1+, 4 individual rare cells in cluster 14 that putatively express CD45+/CD45RB+/CD3+/CD20+/PD-1+, 4 individual rare cells in cluster 15 that putatively express CD45+/CD45RB+/CD3+/IBA1+/CD14+/CD11b+/PD-1+/LAG3+/PD-L1+, or 4 individual rare cells in cluster 16 that putatively express CD45+/CD45RB+/CD3+/CD8a+/CD20+/PD-1+ (Scale bar: 25 µm). Supplementary Table 10 indicates whether visual review of these images by a trained pathologist was deemed to be consistent with the automated calls.

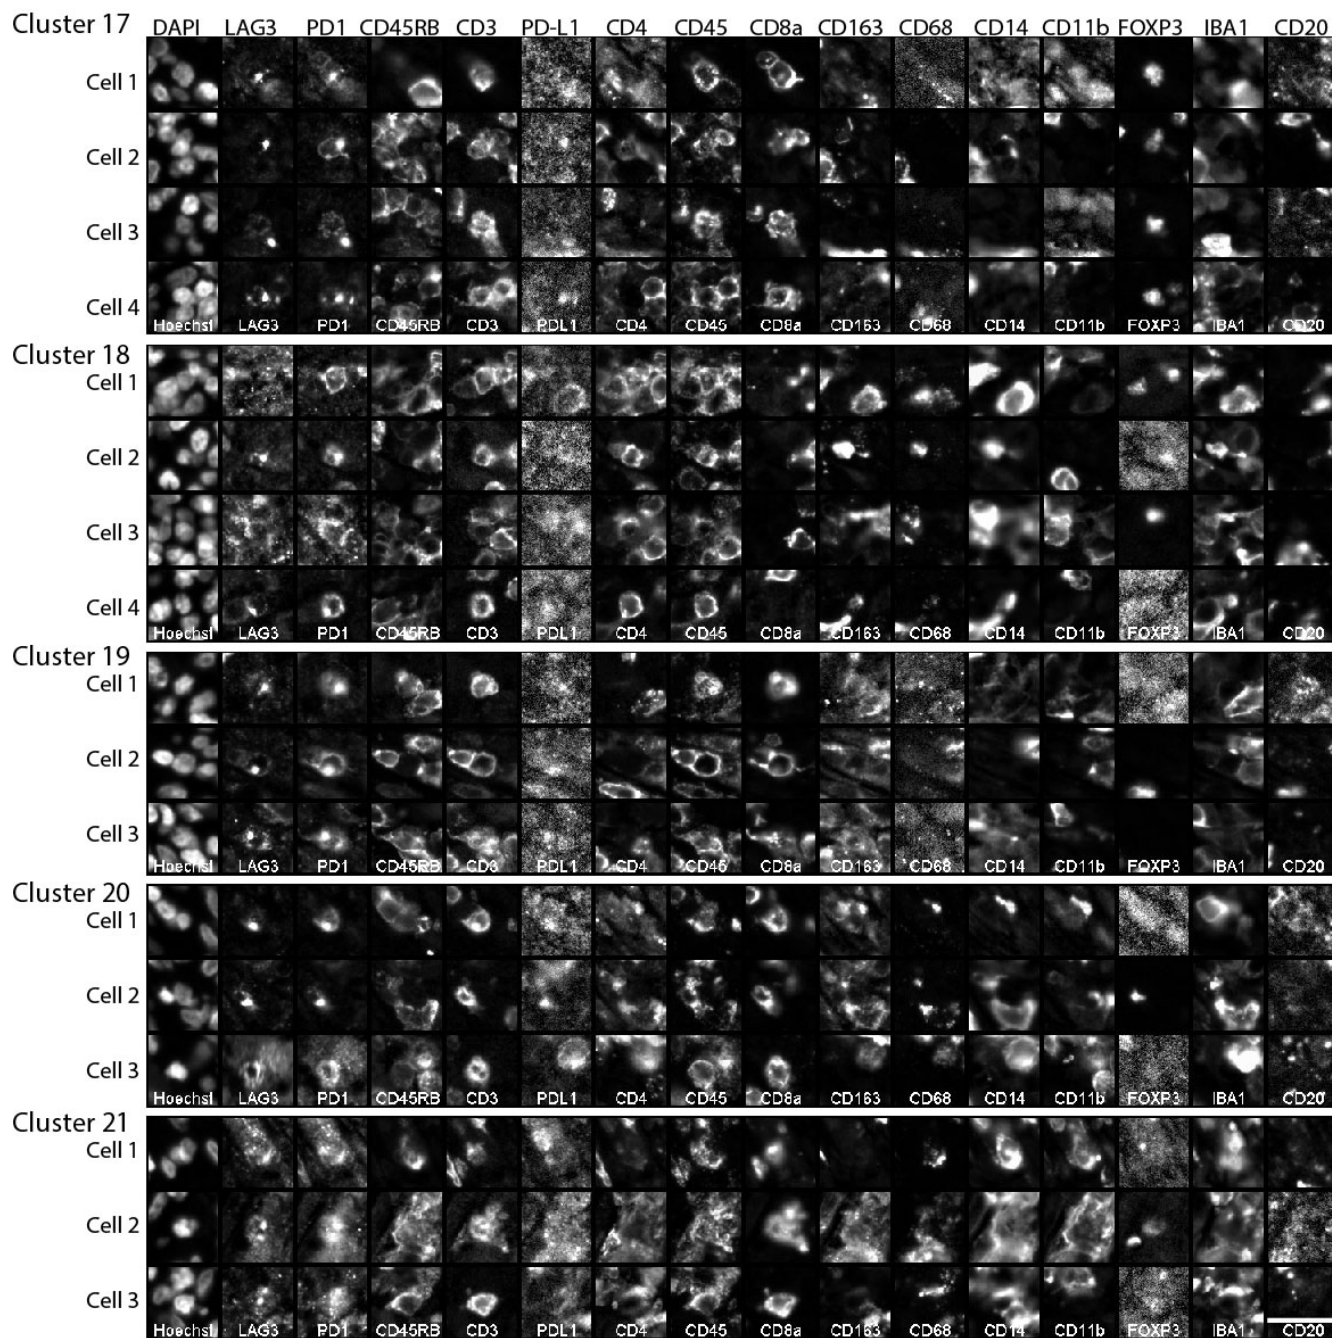

**Supplementary Figure 22**

Galleries of images of immune markers expressed in rare cell clusters 17, 18, 19, 20, and 21.

Galleries of images of immune markers (LAG3, PD-1, CD45RB, CD3, PD-L1, CD4, CD45, CD8a, CD163, CD68, CD14, CD11b, FOXP3, IBA1, CD20) and DNA stain for 4 individual rare cells in cluster 17 identified using automated methods that putatively express CD45+/CD45RB+/CD3+/CD8a+/FOXP3+/PD-1+, 4 individual rare cells in cluster 18 that putatively express CD45+/CD45RB+/CD3+/CD4+/IBA1+/CD163+/CD14+/PD-1+, 3 individual rare cells in cluster 19 that putatively express CD45+/CD45RB+/CD3+/CD8a+/CD11b+/PD-1+, 3 individual rare cells in cluster 20 that putatively express CD45+/CD45RB+/CD3+/CD8a+/IBA1+/PD1+/PD-L1+/LAG3+, or 3 individual rare cells in cluster 21 that putatively express CD45+/CD45RB+/CD3+/CD8a+/IBA1+/CD14+/CD68+/CD11b+/PD-1+/PD-L1+/LAG3+ (Scale bar: 25 µm). Supplementary Table 10 indicates whether visual review of these images by a trained pathologist was deemed to be consistent with the automated calls.

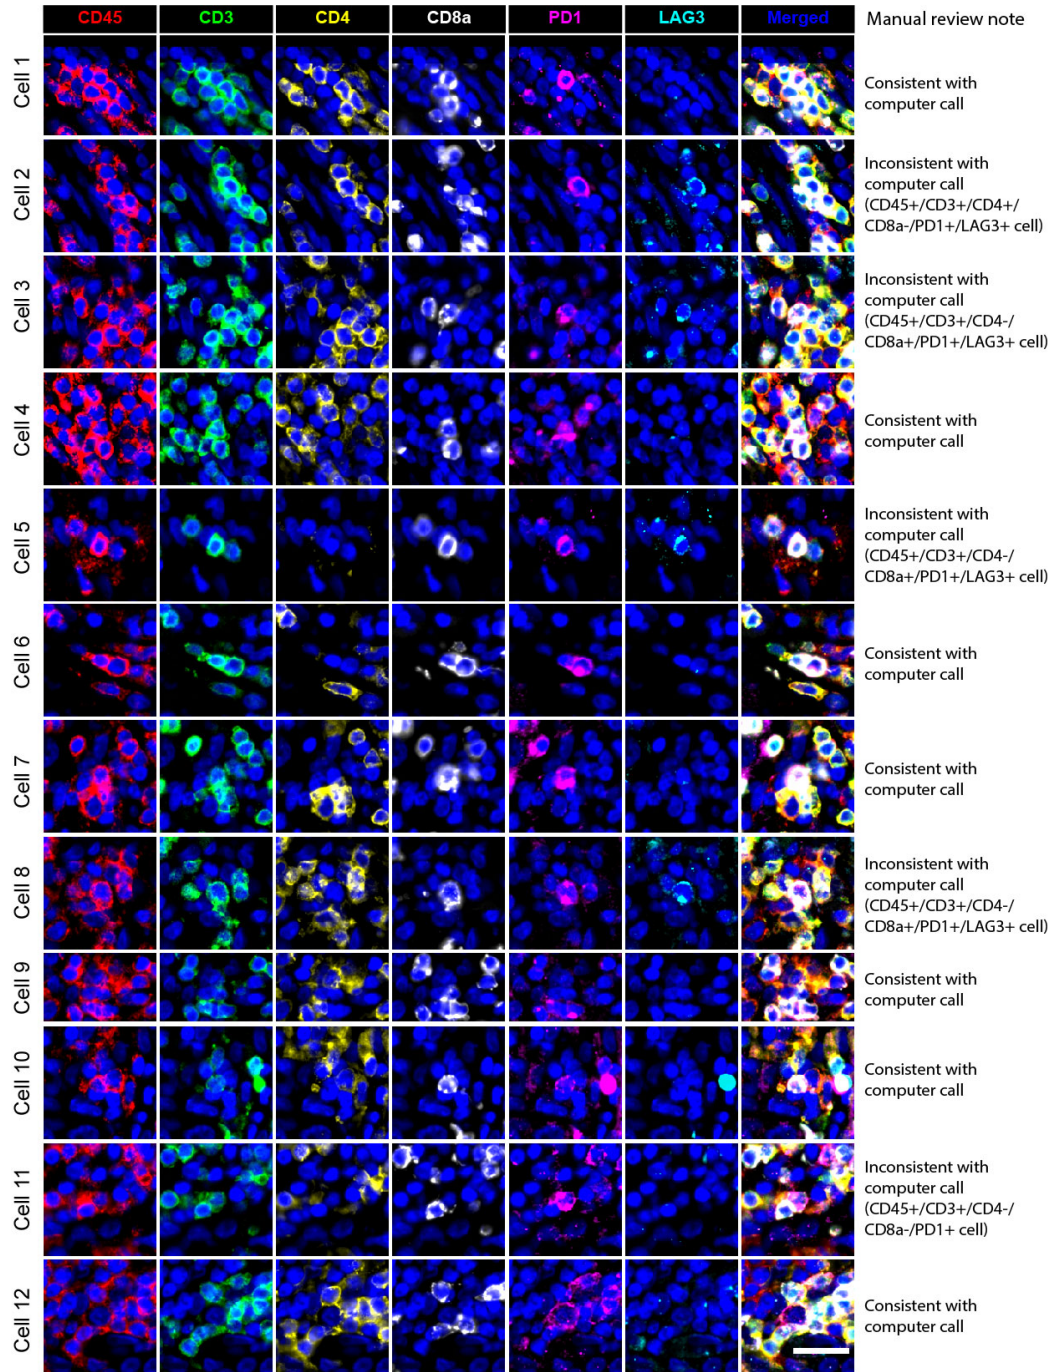

### Supplementary Figure 23

Galleries of images of immune markers expressed in rare cell cluster 1.

Image galleries of cells identified by automated systematic cell calling that express CD45, CD45RB, CD3, CD8a, and PD-1 (rare cell cluster 1, Figure 8) (Scale bar: 25  $\mu$ m) were reviewed by a trained pathologist who then annotated whether the automated calls were consistent with visual review (notes are shown in the right-most column; visual review confirmation for all rare cell populations is presented in Supplementary Table 10). Pseudo-colour images and merged images of the markers are shown here; monochromatic images for this rare cell cluster are shown in Supplementary Figure 17.



**Supplementary Table 1. Dynamic range and Pearson's r of the dynamic range between antibodies.**

| PD1 antibody         |          |          |          |          |          |         |           |
|----------------------|----------|----------|----------|----------|----------|---------|-----------|
| DR value (5%)        | Region 1 | Region 2 | Region 3 | Region 4 | Region 5 | Mean    | std       |
| EPR4877(2) (AB1)     | 20330    | 14263    | 16145    | 4802     | 16161    | 14340.2 | 5775.6718 |
| NAT105 (AB2)         | 1314     | 1062     | 1137     | 654      | 1135     | 1060.4  | 245.41251 |
| EH33 (AB3)           | 19184    | 12397    | 12587    | 4117     | 12569    | 12170.8 | 5348.6358 |
| D4W2J (AB4)          | 42568    | 29480    | 34088    | 9898     | 34073    | 30021.4 | 12202.604 |
| DAP1                 | 9863     | 12595    | 11132    | 12305    | 11152    | 11409.4 | 1088.8417 |
| r value              | Region 1 | Region 2 | Region 3 | Region 4 | Region 5 | Mean    | std       |
| AB1 vs AB2           | 0.91     | 0.77     | 0.82     | 0.64     | 0.86     | 0.8     | 0.1031988 |
| AB1 vs AB3           | 0.99     | 0.99     | 0.99     | 0.99     | 0.99     | 0.99    | 0         |
| AB1 vs AB4           | 0.96     | 0.98     | 0.97     | 0.97     | 0.97     | 0.97    | 0.0070711 |
| AB2 vs AB3           | 0.92     | 0.79     | 0.83     | 0.64     | 0.87     | 0.81    | 0.1065364 |
| AB2 vs AB4           | 0.87     | 0.75     | 0.79     | 0.64     | 0.84     | 0.778   | 0.0898332 |
| AB3 vs AB4           | 0.96     | 0.97     | 0.96     | 0.97     | 0.96     | 0.964   | 0.0054772 |
| AB1 vs DAPI          | -0.1     | -0.01    | -0.06    | -0.02    | -0.07    | -0.052  | 0.0370135 |
| AB2 vs DAPI          | 0.07     | 0.24     | 0.15     | 0.15     | 0.13     | 0.148   | 0.0609918 |
| AB3 vs DAPI          | -0.1     | -0.02    | -0.06    | -0.05    | -0.08    | -0.062  | 0.0303315 |
| AB4 vs DAPI          | -0.12    | -0.03    | -0.08    | -0.07    | -0.1     | -0.08   | 0.0339116 |
| PDL1 antibody        |          |          |          |          |          |         |           |
| DR value (1%)        | Region 1 | Region 2 | Region 3 | Region 4 | Region 5 | Mean    | std       |
| AB1                  | 387      | 403      | 458      | 507      | 510      | 453     | 57.109544 |
| AB2                  | 631      | 579      | 578      | 723      | 601      | 622.4   | 60.222919 |
| AB3                  | 563      | 439      | 799      | 793      | 676      | 654     | 154.38264 |
| DAP1                 | 32558    | 28201    | 29925    | 31639    | 33205    | 31105.6 | 2039.1162 |
| r value              | Region 1 | Region 2 | Region 3 | Region 4 | Region 5 | Mean    | std       |
| AB1 vs AB2           | 0.5      | 0.39     | 0.49     | 0.63     | 0.52     | 0.506   | 0.0856154 |
| AB1 vs AB3           | 0.35     | 0.32     | 0.47     | 0.59     | 0.45     | 0.436   | 0.1071448 |
| AB2 vs AB3           | 0.48     | 0.45     | 0.7      | 0.74     | 0.64     | 0.602   | 0.1304607 |
| AB1 vs DAPI          | -0.11    | -0.18    | -0.01    | -0.09    | -0.15    | -0.108  | 0.0649615 |
| AB2 vs DAPI          | -0.02    | -0.04    | 0.09     | -0.01    | 0        | 0.004   | 0.0502991 |
| AB3 vs DAPI          | 0.36     | 0.27     | 0.28     | 0.17     | 0.25     | 0.266   | 0.0680441 |
| FOXP3 antibody       |          |          |          |          |          |         |           |
| DR value (1%)        | Region 1 | Region 2 | Region 3 | Region 4 | Region 5 | Mean    | std       |
| AB1                  | 614      | 1169.1   | 1286     | 1163     | 1612     | 1168.82 | 359.86068 |
| AB2                  | 337      | 677.14   | 845      | 668      | 982      | 701.828 | 241.7891  |
| DAP1                 | 3993     | 3380     | 3107.1   | 3637     | 3537.1   | 3530.84 | 326.80625 |
| r value              | Region 1 | Region 2 | Region 3 | Region 4 | Region 5 | Mean    | std       |
| AB1 vs AB2           | 0.77     | 0.9      | 0.87     | 0.88     | 0.93     | 0.87    | 0.0604152 |
| AB1 vs DAPI          | 0.35     | 0.3      | 0.25     | 0.23     | 0.22     | 0.27    | 0.0543139 |
| AB2 vs DAPI          | 0.12     | 0.14     | 0.12     | 0.11     | 0.12     | 0.122   | 0.0109545 |
| CD45/CD45RB antibody |          |          |          |          |          |         |           |
| DR value (5%)        | Region 1 | Region 2 | Region 3 | Region 4 | Region 5 | Mean    | std       |
| AB1                  | 603      | 626      | 978      | 836      | 619      | 732.4   | 167.31497 |
| AB2                  | 5187.7   | 6141     | 8169     | 8635.7   | 5705     | 6767.68 | 1538.7942 |
| AB3                  | 18104    | 25262    | 23220    | 25934    | 25728    | 23649.6 | 3281.6269 |
| DAP1                 | 9646     | 8759     | 10044    | 10966    | 9718     | 9826.6  | 795.24763 |
| r value              | Region 1 | Region 2 | Region 3 | Region 4 | Region 5 | Mean    | std       |
| AB1 vs AB2           | 0.78     | 0.77     | 0.77     | 0.8      | 0.68     | 0.76    | 0.0463681 |
| AB1 vs AB3           | 0.65     | 0.71     | 0.65     | 0.73     | 0.53     | 0.654   | 0.0779744 |
| AB2 vs AB3           | 0.85     | 0.91     | 0.85     | 0.9      | 0.79     | 0.86    | 0.0479583 |
| AB1 vs DAPI          | 0.28     | 0.03     | 0.03     | 0.11     | 0.13     | 0.116   | 0.1023719 |
| AB2 vs DAPI          | 0.26     | 0.01     | 0.14     | 0.05     | 0.11     | 0.114   | 0.0960729 |
| AB3 vs DAPI          | 0.18     | -0.04    | 0.05     | 0        | 0.01     | 0.04    | 0.0845577 |
| LAG3 antibody        |          |          |          |          |          |         |           |
| DR value (1%)        | Region 1 | Region 2 | Region 3 | Region 4 | Region 5 | Mean    | std       |
| AB1                  | 3446.3   | 2910.1   | 2317     | 2574     | 1885.1   | 2626.5  | 591.76039 |

|                       |          |          |          |          |          |          |           |
|-----------------------|----------|----------|----------|----------|----------|----------|-----------|
| AB2                   | 8014.1   | 6985.1   | 5816     | 6880     | 8280     | 7195.04  | 986.54369 |
| AB3                   | 4219     | 4720     | 5285     | 4473     | 4971     | 4733.6   | 416.32655 |
| AB4                   | 3752     | 2941     | 4006.3   | 2565.1   | 3758.1   | 3404.5   | 617.93549 |
| AB5                   | 757      | 567      | 655      | 572      | 664      | 643      | 78.099296 |
| DAP1                  | 22329    | 15912    | 15626    | 14576    | 15270    | 16742.6  | 3162.5648 |
| r value               | Region 1 | Region 2 | Region 3 | Region 4 | Region 5 | Mean     | std       |
| AB1 vs AB2            | 0.67     | 0.7      | 0.53     | 0.61     | 0.42     | 0.586    | 0.1132696 |
| AB1 vs AB3            | 0.71     | 0.62     | 0.35     | 0.54     | 0.41     | 0.526    | 0.1477498 |
| AB1 vs AB4            | 0.29     | 0.46     | 0.19     | 0.3      | 0.11     | 0.27     | 0.1317194 |
| AB1 vs AB5            | 0.14     | 0.1      | 0.09     | 0.13     | 0.09     | 0.11     | 0.0234521 |
| AB2 vs AB3            | 0.54     | 0.58     | 0.32     | 0.48     | 0.28     | 0.44     | 0.1334166 |
| AB2 vs AB4            | 0.17     | 0.36     | 0.11     | 0.22     | 0.06     | 0.184    | 0.1154556 |
| AB2 vs AB5            | 0.01     | 0.05     | 0.06     | 0.04     | 0.04     | 0.04     | 0.0187083 |
| AB3 vs AB4            | 0.32     | 0.43     | 0.19     | 0.31     | 0.18     | 0.286    | 0.1035857 |
| AB3 vs AB5            | 0.26     | 0.17     | 0.22     | 0.21     | 0.27     | 0.226    | 0.0403733 |
| AB4 vs AB5            | 0.32     | 0.15     | 0.24     | 0.19     | 0.24     | 0.228    | 0.0637966 |
| AB1 vs DAPI           | 0.01     | 0        | 0.04     | 0.02     | 0.05     | 0.024    | 0.0207364 |
| AB2 vs DAPI           | -0.15    | -0.13    | -0.1     | -0.17    | -0.14    | -0.138   | 0.0258844 |
| AB3 vs DAPI           | 0.03     | 0.07     | 0.08     | 0.01     | 0.19     | 0.076    | 0.069857  |
| AB4 vs DAPI           | 0.01     | 0.04     | 0.03     | 0.02     | 0.03     | 0.026    | 0.0114018 |
| AB5 vs DAPI           | 0.48     | 0.31     | 0.26     | 0.47     | 0.34     | 0.372    | 0.0983362 |
| <b>CD11b antibody</b> |          |          |          |          |          |          |           |
| DR value (5%)         | Region 1 | Region 2 | Region 3 | Region 4 | Region 5 | Mean     | std       |
| AB1                   | 12852    | 9843.7   | 7853     | 27859    | 4263     | 12534.14 | 9117.506  |
| AB2                   | 10564    | 10345    | 7603     | 23983    | 5501     | 11599.2  | 7231.1966 |
| AB3                   | 13803    | 13227    | 14560    | 27334    | 10172    | 15819.2  | 6649.2788 |
| DAP1                  | 8703     | 9409     | 10083    | 10521    | 10152    | 9773.6   | 720.52745 |
| r value               | Region 1 | Region 2 | Region 3 | Region 4 | Region 5 | Mean     | std       |
| AB1 vs AB2            | 0.92     | 0.93     | 0.87     | 0.97     | 0.8      | 0.898    | 0.0653452 |
| AB1 vs AB3            | 0.89     | 0.78     | 0.62     | 0.87     | 0.5      | 0.732    | 0.1678392 |
| AB2 vs AB3            | 0.92     | 0.8      | 0.67     | 0.88     | 0.62     | 0.778    | 0.1300769 |
| AB1 vs DAPI           | -0.25    | -0.19    | -0.24    | -0.27    | -0.18    | -0.226   | 0.0391152 |
| AB2 vs DAPI           | -0.31    | -0.22    | -0.28    | -0.3     | -0.17    | -0.256   | 0.0594138 |
| AB3 vs DAPI           | -0.38    | -0.22    | -0.35    | -0.34    | -0.17    | -0.292   | 0.0914877 |

DR: Dynamic Range; r: Pearson correlation coefficient

**Supplementary Table 2: t-CyCIF immune profile antibody panel.**

| Antibody name | Target gene | Clone      | Company                   | Cat#         | Conjugation      | Cycle No | Tonsil No | RRID (RESEARCH RESOURCE IDENTIFIERS) | Dilution |
|---------------|-------------|------------|---------------------------|--------------|------------------|----------|-----------|--------------------------------------|----------|
| PD1 AB1       | PD1         | EPR4877(2) | Abcam                     | ab201825     | Alexa Fluor® 647 | 2        | 1         |                                      | 100      |
| PD1 AB2       | PD1         | NAT105     | Abcam                     | ab195885     | Alexa Fluor® 488 | 2        | 1         |                                      | 100      |
| PD1 AB3       | PD1         | EH33       | Cell Signaling Technology | 43248        | Primary mouse    | 1        | 1         |                                      | 100      |
| PD1 AB4       | PD1         | D4W2J      | Cell Signaling Technology | 86163        | Primary rabbit   | 1        | 1         |                                      | 100      |
| PD-L1 AB1     | PD-L1       | E1L3N      | Cell Signaling Technology | 15005S       | Alexa Fluor® 647 | 2        | 2         |                                      | 100      |
| PD-L1 AB2     | PD-L1       | 22C3       | DAKO                      | M365329-1    | Primary mouse    | 1        | 2         |                                      | 100      |
| PD-L1 AB3     | PD-L1       | 28-8       | Abcam                     | ab213358     | Alexa Fluor® 555 | 2        | 2         |                                      | 100      |
| FOXP3 AB1     | FOXP3       | 236A/E7    | eBioscience               | 41-4777-80   | eFluor 570       | 7        | 3         | AB_2573608                           | 100      |
| FOXP3 AB2     | FOXP3       | 206D       | BioLegend                 | 320113       | Alexa Fluor® 647 | 7        | 3         | AB_439753                            | 100      |
| LAG3 AB1      | LAG3        | EPR4392(2) | Abcam                     | ab180187     | Primary rabbit   | 1        | 4         |                                      | 100      |
| LAG3 AB2      | LAG3        | Polyclonal | R&D systems               | FAB2319P     | PE               | 2        | 4         | AB_2133351                           | 100      |
| LAG3 AB3      | LAG3        | 17B4       | Lifespan                  | LS-C344749   | Atto 647N        | 2        | 4         |                                      | 100      |
| LAG3 AB4      | LAG3        | 11 E3      | Abcam                     | ab40465      | Primary mouse    | 1        | 4         | AB_776102                            | 100      |
| LAG3 AB5      | LAG3        | T47-530    | BD Bioscience             | 565617       | PE               | 3        | 4         |                                      | 100      |
| CD11b AB1     | CD11b       | EP1345Y    | Abcam                     | ab52478      | Primary rabbit   | 1        | 5         | AB_868788                            | 100      |
| CD11b AB2     | CD11b       | C67F154    | eBioscience               | 53-0196-80   | Alexa Fluor® 488 | 2        | 5         | AB_2637195                           | 100      |
| CD11b AB3     | CD11b       | EPR1344    | Abcam                     | ab204271     | Alexa Fluor® 488 | 3        | 5         |                                      | 100      |
| CD45 AB1      | CD45        | 2D1        | R&D Systems               | FAB1430P-025 | PE               | 3        | 5         | AB_2237898                           | 100      |
| CD45 AB2      | CD45        | HI30       | BioLegend                 | 304056       | Alexa Fluor® 647 | 3        | 5         | AB_2564155                           | 100      |
| CD45RB AB3    | CD45RB      | PD7/26     | eBioscience               | 53-9458-80   | Alexa Fluor® 488 | 4        | 5         | AB_2574448                           | 100      |

Supplementary Table 3: Antibody information for the immune t-CyCIF panel.

| no | Antibody name | Function             | Clone      | Company                   | Cat#         | Conjugation      | RRID<br>(RESEARCH<br>RESOURCE<br>IDENTIFIERS) | Dilution | Final<br>Concentration<br>(ug/ml) | Validation approaches                 |
|----|---------------|----------------------|------------|---------------------------|--------------|------------------|-----------------------------------------------|----------|-----------------------------------|---------------------------------------|
| 1  | CD19          | B cells              | EPR5906    | Abcam                     | ab196468     | Alexa Fluor* 488 |                                               | 100      | 5                                 | Cell level, Tissue level              |
| 2  | CD20          | B cells              | L26        | eBioscience               | 50-0202-80   | eFluor* 660      | AB_11151691                                   | 250      | 0.8                               | Cell level, Tissue level              |
| 3  | LAG3          | Checkpoint           | EPR4392(2) | Abcam                     | ab180187     | Primary rabbit   |                                               | 100      | 4.5                               | Pixel level, Cell level, Tissue level |
| 4  | PD1           | Checkpoint           | EPR4877(2) | Abcam                     | ab201825     | Alexa Fluor* 647 |                                               | 100      | 5                                 | Pixel level, Cell level, Tissue level |
| 5  | PD-L1         | Checkpoint           | E1L3N      | Cell Signaling Technology | 15005S       | Alexa Fluor* 647 |                                               | 100      | 2                                 | Pixel level, Cell level, Tissue level |
| 6  | CD45          | Lymphocyte           | 2D1        | R&D Systems               | FAB1430P-025 | PE               | AB_2237898                                    | 100      | 0.25                              | Pixel level, Cell level, Tissue level |
| 7  | CD45RB        | Lymphocyte           | PD7/26     | eBioscience               | 53-9458-80   | Alexa Fluor* 488 | AB_2574448                                    | 100      | 5                                 | Pixel level, Cell level, Tissue level |
| 8  | CD11b         | Macrophage           | C67F154    | eBioscience               | 53-0196-80   | Alexa Fluor* 488 | AB_2637195                                    | 100      | 5                                 | Pixel level, Cell level, Tissue level |
| 9  | CD14          | Macrophage           | EPR3653    | Abcam                     | ab196169     | Alexa Fluor* 647 |                                               | 100      | 5                                 | Cell level, Tissue level              |
| 10 | CD163         | Macrophage           | EPR14643   | Abcam                     | ab218293     | Alexa Fluor* 488 |                                               | 100      | 5                                 | Cell level, Tissue level              |
| 11 | CD68          | Macrophage           | D4B9C      | Cell Signaling Technology | 79594        | PE               |                                               | 100      | 3.1                               | Cell level, Tissue level              |
| 12 | IBA1          | Macrophage           | EPR6136    | Abcam                     | ab195031     | Alexa Fluor* 488 |                                               | 250      | 2                                 | Cell level, Tissue level              |
| 13 | CD8a          | T cell (Cytotoxic)   | AMC908     | eBioscience               | 50-0008-80   | eFluor* 660      | AB_2574148                                    | 100      | 2                                 | Cell level, Tissue level              |
| 14 | CD4           | T cell (T helper)    | Polyclonal | R&D Systems               | FAB8165G     | Alexa Fluor* 488 |                                               | 100      | 0.5                               | Cell level, Tissue level              |
| 15 | FOXP3         | T cell (Treg)        | 236A/E7    | eBioscience               | 41-4777-80   | eFluor 570       | AB_2573608                                    | 100      | 2                                 | Pixel level, Cell level, Tissue level |
| 16 | CD3           | T cell marker        | EP4426     | Abcam                     | ab208514     | Alexa Fluor* 555 |                                               | 100      | 5                                 | Cell level, Tissue level              |
| 17 | Ki67          | Other(Proliferation) | D3B5       | Cell Signaling Technology | 11882s       | Alexa Fluor* 488 | AB_2687824                                    | 100      | 1                                 | Cell level, Tissue level              |
| 18 | alpha-SMA     | Other(Stromal)       | EPR5368    | Abcam                     | ab202509     | Alexa Fluor* 555 |                                               | 250      | 2                                 | Cell level, Tissue level              |
| 19 | Pan Keratin   | Other(Tumor marker)  | AE1/AE3    | eBioscience               | 41-9003-80   | eFluor* 570      | AB_11217482                                   | 100      | 2                                 | Cell level, Tissue level              |
| 20 | GFAP          | Other (Glial)        | GA5        | eBioscience               | 41-9892-80   | eFluor 570       |                                               | 100      | 2                                 | Cell level, Tissue level              |

**Supplementary Table 4: Clinical antibodies used for immunohistochemistry validation.**

| <b>Antibody name</b> | <b>Clone</b> | <b>Company</b> | <b>Cat#</b> | <b>Resource</b>   | <b>RRID (RESEARCH RESOURCE IDENTIFIERS)</b> | <b>Dilution</b> |
|----------------------|--------------|----------------|-------------|-------------------|---------------------------------------------|-----------------|
| <b>CD3</b>           | polyclonal   | DakoCytomation | A0452       | rabbit polyclonal | AB_2335677                                  | 300             |
| <b>CD4</b>           | SP35         | Cell Marque    | 104R-14     | rabbit monoclonal | AB_1516770                                  | 150             |
| <b>CD8</b>           | C8/144B      | Cell Marque    | 108M94      | mouse monoclonal  | AB_1158205                                  | 100             |
| <b>CD20</b>          | L26          | DakoCytomation | M0755       | mouse monoclonal  | AB_2282030                                  | 600             |
| <b>CD68</b>          | KP1          | DakoCytomation | M0814       | mouse monoclonal  | AB_2314148                                  | 1000            |
| <b>FoxP3</b>         | 259D         | BioLegend      | 320201      | mouse monoclonal  | AB_430884                                   | 100             |
| <b>PD-1</b>          | EH33         | Cell Signaling | 43248       | mouse monoclonal  |                                             | 200             |
| <b>PD-L1</b>         | E1L3N        | Cell Signaling | 13684       | rabbit monoclonal |                                             | 100             |

**Supplementary Table 5: Antigenicity with cycle number in t-CyCIF.**

| Cycle No | Tonsil No | Channel No | Antigen | Company     | Cat No     | Dilution | exposure time (s) | Lot No        |
|----------|-----------|------------|---------|-------------|------------|----------|-------------------|---------------|
| 2        | 4         | 4          | CD14    | Abcam       | ab196169   | 1000     | 0.5               | GR219132-2    |
| 5        | 7         | 4          | CD14    | Abcam       | ab196169   | 1000     | 0.5               | GR219132-2    |
| 6        | 8         | 4          | CD14    | Abcam       | ab196169   | 1000     | 0.5               | GR219132-2    |
| 7        | 2         | 4          | CD14    | Abcam       | ab196169   | 1000     | 0.5               | GR219132-2    |
| 2        | 8         | 2          | CD163   | Abcam       | ab218293   | 300      | 0.5               | GR314696-1    |
| 3        | 7         | 2          | CD163   | Abcam       | ab218293   | 300      | 0.5               | GR314696-1    |
| 8        | 5         | 2          | CD163   | Abcam       | ab218293   | 300      | 0.5               | GR314696-1    |
| 3        | 6         | 4          | CD20    | eBioscience | 50-0202-80 | 1000     | 0.2               | 1917808       |
| 5        | 5         | 4          | CD20    | eBioscience | 50-0202-80 | 1000     | 0.2               | 1917808       |
| 6        | 4         | 4          | CD20    | eBioscience | 50-0202-80 | 1000     | 0.2               | 1917808       |
| 7        | 7         | 4          | CD20    | eBioscience | 50-0202-80 | 1000     | 0.2               | 1917808       |
| 2        | 2         | 3          | CD3D    | Abcam       | ab208514   | 150      | 0.5               | GR3184181-1   |
| 3        | 5         | 3          | CD3D    | Abcam       | ab208514   | 150      | 0.5               | GR3184181-1   |
| 5        | 6         | 3          | CD3D    | Abcam       | ab208514   | 150      | 0.5               | GR3184181-1   |
| 6        | 1         | 3          | CD3D    | Abcam       | ab208514   | 150      | 0.5               | GR3184181-1   |
| 7        | 3         | 3          | CD3D    | Abcam       | ab208514   | 150      | 0.5               | GR3184181-1   |
| 5        | 4         | 2          | CD4     | R&D         | FAB8165G   | 300      | 0.5               | adya0116061   |
| 6        | 5         | 2          | CD4     | R&D         | FAB8165G   | 300      | 0.5               | adya0116061   |
| 7        | 7         | 2          | CD4     | R&D         | FAB8165G   | 300      | 0.5               | adya0116061   |
| 3        | 4         | 3          | CD68    | CST         | 79594S     | 1000     | 0.5               | lot 1 07/2017 |
| 5        | 3         | 3          | CD68    | CST         | 79594S     | 1000     | 0.5               | lot 1 07/2017 |
| 6        | 6         | 3          | CD68    | CST         | 79594S     | 1000     | 0.5               | lot 1 07/2017 |
| 7        | 8         | 3          | CD68    | CST         | 79594S     | 1000     | 0.5               | lot 1 07/2017 |
| 2        | 6         | 4          | CD8a    | eBioscience | 50-0008-82 | 200      | 0.5               | E24991-10     |
| 3        | 7         | 4          | CD8a    | eBioscience | 50-0008-82 | 200      | 0.5               | E24991-10     |
| 5        | 2         | 4          | CD8a    | eBioscience | 50-0008-82 | 200      | 0.5               | E24991-10     |
| 6        | 3         | 4          | CD8a    | eBioscience | 50-0008-82 | 200      | 0.5               | E24991-10     |
| 7        | 8         | 4          | CD8a    | eBioscience | 50-0008-82 | 200      | 0.5               | E24991-10     |
| 3        | 6         | 3          | FOXP3   | eBioscience | 41-4777-82 | 150      | 0.5               | 1928216       |
| 5        | 8         | 3          | FOXP3   | eBioscience | 41-4777-82 | 150      | 0.5               | 1928216       |
| 6        | 7         | 3          | FOXP3   | eBioscience | 41-4777-82 | 150      | 0.5               | 1928216       |
| 7        | 1         | 3          | FOXP3   | eBioscience | 41-4777-82 | 150      | 0.5               | 1928216       |
| 3        | 8         | 2          | IBA1    | Abcam       | ab195031   | 500      | 0.5               | GR229273-5    |
| 5        | 1         | 2          | IBA1    | Abcam       | ab195031   | 500      | 0.5               | GR229273-5    |
| 6        | 2         | 2          | IBA1    | Abcam       | ab195031   | 500      | 0.5               | GR229273-5    |
| 7        | 6         | 2          | IBA1    | Abcam       | ab195031   | 500      | 0.5               | GR229273-5    |
| 3        | 3         | 3          | Keratin | eBioscience | 41-9003-82 | 1000     | 0.1               | 1926084       |
| 5        | 2         | 3          | Keratin | eBioscience | 41-9003-82 | 1000     | 0.1               | 1926084       |
| 6        | 8         | 3          | Keratin | eBioscience | 41-9003-82 | 1000     | 0.1               | 1926084       |
| 7        | 4         | 3          | Keratin | eBioscience | 41-9003-82 | 1000     | 0.1               | 1926084       |

**Supplementary Table 6: Correlation in staining intensity between early and late cycles.**

Part 1. Overlapped histogram region for antigenicity with cycle number in t-CyCIF.

| Cycle No. | CD3D | CD4  | CD8a | CD20 | FOXP3* | IBA1 | CD14 | CD68 | CD163 | Keratin* |
|-----------|------|------|------|------|--------|------|------|------|-------|----------|
| 2         | 1    |      | 1    |      |        |      | 1    |      | 1     |          |
| 3         | 0.76 |      | 0.45 | 1    | 1      | 1    |      | 1    | 0.7   | 1        |
| 5         | 0.64 | 1    | 0.68 | 0.88 | 0.6    | 0.8  | 0.46 | 0.29 |       | 0.35     |
| 6         | 0.21 | 0.77 | 0.79 | 0.91 | 0.31   | 0.74 | 0.38 | 0.29 |       | 0.45     |
| 7         | 0.24 | 0.72 | 0.87 | 0.85 | 0.29   | 0.59 | 0.93 | 0.2  |       | 0.24     |
| 8         |      |      |      |      |        |      |      |      | 0.5   |          |

\* The signal intensity of the FOXP3- and keratin-negative population decreased at high cycle numbers in t-CyCIF, while the signal from positive populations stabilized.

Part 2. The percentage of T cells and macrophages identified by CD3 and CD68 antibodies in different cycles by applying different cut-off values

| Antibody | Cycle No | Cut off value (log) | % of positive population |
|----------|----------|---------------------|--------------------------|
| CD3D     | 2        | 7.49                | 41.60%                   |
| CD3D     | 3        | 7.49                | 46.85%                   |
| CD3D     | 5        | 6.91                | 42.07%                   |
| CD3D     | 6        | 5.44                | 43.09%                   |
| CD3D     | 7        | 5.52                | 47.05%                   |
| CD68     | 3        | 6.55                | 11.14%                   |
| CD68     | 5        | 5.39                | 12.17%                   |
| CD68     | 6        | 5.39                | 13.55%                   |
| CD68     | 7        | 5.3                 | 10.58%                   |

**Supplementary Table 7: The percentage of tumor cells, fibroblasts and immune cells (percentage of all cells) in lung cancer cases.**

| Cell types                     | Sub-types                                        | LUNG-1-LN | LUNG-2-BR | LUNG-3-PR |
|--------------------------------|--------------------------------------------------|-----------|-----------|-----------|
| Keratin+ (tumor cells)         |                                                  | 20.49     | 44.45     | 23.16     |
|                                | Keratin+/PD-L1+ (PD-L1+ tumor cells)             | 4.21      | 0.4       | 6.08      |
|                                | Keratin+/PD-L1- (PD-L1- tumor cells)             | 16.28     | 44.05     | 17.07     |
|                                | Keratin+/Ki67+ (Cycling tumor cells)             | 6.48      | 3.1       | 4.53      |
|                                | Keratin+/Ki67- (Non-Cycling tumor cells)         | 14.01     | 41.35     | 18.63     |
|                                | Ratio (Ki67+/Ki67-)                              | 46.25     | 7.49      | 24.31     |
| CD45+ or IBA1 + (immune cells) |                                                  | 59.25     | 34.06     | 58.15     |
|                                | CD45+ or IBA1 +/PD-L1+ (PD-L1+ immune cells)     | 13.34     | 2.88      | 8.18      |
|                                | CD45+ or IBA1 +/PD-L1- (PD-L1- immune cells)     | 45.9      | 31.17     | 49.97     |
|                                | CD45+ or IBA1 +/Ki67+ (Cycling immune cells)     | 8.98      | 1.49      | 6.18      |
|                                | CD45+ or IBA1 +/Ki67- (Non-Cycling immune cells) | 50.27     | 32.56     | 51.97     |
|                                | Ratio (Ki67+/Ki67-)                              | 17.86     | 4.57      | 11.89     |
| aSMA+ (fibroblasts)            |                                                  | 23.39     | 11.78     | 34.98     |
|                                | a SMA+/Ki67+ (Cycling fibroblasts)               | 1.89      | 0.44      | 1.51      |
|                                | a SMA+/Ki67- (Non-Cycling fibroblasts)           | 21.5      | 11.34     | 33.46     |
|                                | Ratio (Ki67+/Ki67-)                              | 8.79      | 3.88      | 4.51      |
| GFAP+ (glial cells)            |                                                  | 0         | 15.63     | 0         |
|                                | GFAP+/Ki67+ (Cycling glial cells)                | 0         | 0.09      | 0         |
|                                | GFAP+/Ki67- (Non-Cycling glial cells)            | 0         | 15.54     | 0         |
|                                | Ratio (Ki67+/Ki67-)                              | N/A       | 0.57      | N/A       |

LUNG-1-LN: lung adenocarcinoma metastasis to lymph node  
 LUNG-2-BR: lung squamous cell carcinoma metastasis to brain  
 LUNG-3-PR: primary lung squamous cell carcinoma



**Supplementary Table 8: The immune profile (percentage of all immune cells) in lung cancer cases.**

| Immune cell types                    | Sub-types                                  | LUNG-1-LN | LUNG-2-BR | LUNG-3-PR |
|--------------------------------------|--------------------------------------------|-----------|-----------|-----------|
| <b>Lymphocytes components</b>        |                                            |           |           |           |
| CD45+                                |                                            | 63.01     | 59.3      | 87.43     |
| CD45RB+                              |                                            | 81.48     | 48.93     | 75.1      |
| CD45+/CD45RB+                        |                                            | 56.22     | 36.39     | 70.36     |
| CD45+/CD3+ (T cells)                 |                                            | 44.92     | 11.66     | 26.71     |
|                                      | CD45+/CD3+/CD4+ (CD4+ T cells)             | 11.75     | 8.48      | 8.44      |
|                                      | CD45+/CD3+/CD8a+ (CD8a+ T cells)           | 30.34     | 1.2       | 11.36     |
|                                      | CD45+/CD3+/CD4-/CD8a- (CD4-/CD8a- T cells) | 5.77      | 2.27      | 8.31      |
| CD45+/CD20+ (B cells)                |                                            | 1.9       | 0.16      | 13.15     |
| CD45+/CD3-/CD20-                     |                                            | 17.22     | 47.5      | 51.92     |
| <b>Inhibitory T cells components</b> |                                            |           |           |           |
| CD45+/CD3+/PD1-                      |                                            | 41.32     | 10.92     | 24.22     |
| CD45+/CD3+/PD1+                      |                                            | 3.6       | 0.75      | 2.49      |
|                                      | CD45+/CD3+/CD4+/CD8a-/PD1+                 | 1.85      | 0.64      | 0.45      |
|                                      | CD45+/CD3+/CD4-/CD8a+/PD1+                 | 2.14      | 0.071     | 1.89      |
| CD45+/CD3+/LAG3+                     |                                            | 1.31      | 0.045     | 1.34      |
|                                      | CD45+/CD3+/CD4+/CD8a-/LAG3+                | 0.16      | 0.032     | 0.14      |
|                                      | CD45+/CD3+/CD4-/CD8a+/LAG3+                | 1.1       | 0.019     | 1.09      |
| CD45+/CD3+/PD1+/LAG3+                |                                            | 0.87      | 0.045     | 1.21      |
|                                      | CD45+/CD3+/CD4+/CD8a-/LAG3+/PD1+           | 0.073     | 0.026     | 0.084     |
|                                      | CD45+/CD3+/CD4-/CD8a+/LAG3+/PD1+           | 0.67      | 0.013     | 0.97      |
| CD45+/CD3+/FOXP3+                    |                                            | 2.98      | 2.78      | 7.89      |
|                                      | CD45+/CD3+/CD4+/CD8a-/FOXP3+               | 2.31      | 2.65      | 6.08      |
|                                      | CD45+/CD3+/CD4-/CD8a+/FOXP3+               | 0.031     | 0.0065    | 0.66      |
| CD45+/PD-L1+                         |                                            | 14.81     | 5.32      | 12.34     |
|                                      | CD45+/CD3+/PD-L1+                          | 10.07     | 0.79      | 4.42      |
|                                      | CD45+/CD20+/PD-L1+                         | 0.35      | 0         | 0.73      |
| <b>Macrophages components</b>        |                                            |           |           |           |
| IBA1+/CD163+                         |                                            | 38.34     | 70.14     | 27.92     |
| IBA1+/CD68+                          |                                            | 8.59      | 55.8      | 13.57     |
| IBA1+/CD14+                          |                                            | 38.39     | 69.89     | 33.87     |
| IBA+/CD11b+                          |                                            | 14.87     | 53.77     | 18.78     |
| IBA1-/CD11b+                         |                                            | 3.07      | 6.91      | 11.42     |
| IBA1+/PD-L1+                         |                                            | 18.51     | 7.94      | 10.36     |
| CD19                                 |                                            | 0         | 0         | 0         |

LUNG-1-LN: lung adenocarcinoma metastasis to lymph node

LUNG-2-BR: lung squamous cell carcinoma metastasis to brain

LUNG-3-PR: primary lung squamous cell carcinoma

**Supplementary Table 9: Regional enrichment analysis (percentage of all immune cells) of rare immune cells in primary lung cancer LUNG-3-PR.**

| Regional enrichment analysis*    |      | Tumor |      | Non-Tumor |       | FC   | P-Value |
|----------------------------------|------|-------|------|-----------|-------|------|---------|
| % of total immune cells          | Mean | SEM   | Mean | SEM       |       |      |         |
| CD45+/CD3+/FOXP3+/CD4-/CD8a-     | 6.60 | 0.02  | 2.91 | 0.02      | 2.27  | 0.00 |         |
| CD45+/CD3+/FOXP3+/CD4-/CD8a+     | 0.74 | 0.00  | 0.12 | 0.00      | 6.02  | 0.00 |         |
| CD45+/CD3+/PD1+/LAG3+/CD4+/CD8a- | 0.10 | 0.00  | 0.00 | 0.00      | Inf   | 0.00 |         |
| CD45+/CD3+/PD1+/LAG3+/CD4-/CD8a+ | 1.10 | 0.01  | 0.08 | 0.00      | 14.36 | 0.00 |         |
| Manual counting**                |      | Tumor |      | Non-Tumor |       | FC   | P-Value |
| % of total immune cells          | Mean | SEM   | Mean | SEM       |       |      |         |
| CD45+/CD3+/FOXP3+/CD4-/CD8a-     | 6.84 | 1.53  | 1.46 | 1.08      | 4.68  | 0.02 |         |
| CD45+/CD3+/FOXP3+/CD4-/CD8a+     | 1.40 | 0.28  | 0.27 | 0.27      | 5.11  | 0.02 |         |
| CD45+/CD3+/PD1+/LAG3+/CD4+/CD8a- | 0.28 | 0.09  | 0.00 | 0.00      | Inf   | 0.01 |         |
| CD45+/CD3+/PD1+/LAG3+/CD4-/CD8a+ | 1.19 | 0.29  | 0.00 | 0.00      | Inf   | 0.00 |         |

Inf: Infinity

SEM: standard error of the mean

FC: fold change

\* To analyze the relative frequency of rare immune cell types in the tumor region versus the non-tumor region, we defined the tumor region as all cells within 80 μm of the tumor cells (defined by keratin positivity) so as to capture direct contact between tumor cells and their immediate surroundings. The rare cells were then counted in both the tumor and non-tumor regions, and normalized to all immune cell counts (CD45+ or IBA1+) present in the imaged section. To estimate the sampling error for such rare populations, we performed bootstrapping by resampling each region's cells with replacement and applying the same cutoffs.

\* Detailed information listed below: Five frames of tumor region and non-tumor region were selected to count rare immune cells in primary lung cancer LUNG-3-PR according to presence of keratin expression (labeled tumor cells) respectively, then a t-test was performed to compare the differences between groups. The 'manual' counting was performed by visual review of images by a trained pathologist.

**Detailed information of manual counting of rare immune cells in primary lung cancer LUNG-3-PR**

| Frame                                             | Tumor Region |      |       |      |      | Non-Tumor Region |      |      |      |      |
|---------------------------------------------------|--------------|------|-------|------|------|------------------|------|------|------|------|
|                                                   | 1            | 2    | 58    | 70   | 130  | 98               | 99   | 86   | 87   | 88   |
| Total number of all immune cells (CD45+ or IBA1+) | 203          | 221  | 337   | 564  | 338  | 57               | 42   | 73   | 36   | 59   |
| CD45+/CD3+/FOXP3+/CD4-/CD8a-                      |              |      |       |      |      |                  |      |      |      |      |
| Number                                            | 15           | 21   | 36    | 19   | 11   | 1                | 0    | 0    | 2    | 0    |
| % of total immune cells                           | 7.39         | 9.50 | 10.68 | 3.37 | 3.25 | 1.75             | 0.00 | 0.00 | 5.56 | 0.00 |
| CD45+/CD3+/FOXP3+/CD4-/CD8a+                      |              |      |       |      |      |                  |      |      |      |      |
| Number                                            | 4            | 3    | 7     | 4    | 3    | 0                | 0    | 1    | 0    | 0    |
| % of total immune cells                           | 1.97         | 1.36 | 2.08  | 0.71 | 0.89 | 0.00             | 0.00 | 1.37 | 0.00 | 0.00 |
| CD45+/CD3+/PD1+/LAG3+/CD4-/CD8a+                  |              |      |       |      |      |                  |      |      |      |      |
| Number                                            | 4            | 2    | 6     | 4    | 2    | 0                | 0    | 0    | 0    | 0    |
| % of total immune cells                           | 1.97         | 0.90 | 1.78  | 0.71 | 0.59 | 0.00             | 0.00 | 0.00 | 0.00 | 0.00 |
| CD45+/CD3+/PD1+/LAG3+/CD4+/CD8a-                  |              |      |       |      |      |                  |      |      |      |      |
| Number                                            | 1            | 1    | 0     | 1    | 1    | 0                | 0    | 0    | 0    | 0    |
| % of total immune cells                           | 0.49         | 0.45 | 0.00  | 0.18 | 0.30 | 0.00             | 0.00 | 0.00 | 0.00 | 0.00 |

**Supplementary Table 10: Automated systematic identification of rare PD-1 expressing immune cell populations and visual assessment of results**

| Cluster | Marker expression combinations identified by automated          | Automated calls (number of each cell type identified for each cluster) | Visual Review Consistent with Automated Calls | Visual Review Inconsistent with Automated Calls | Confirmed rare subtype (cluster validated) |  |
|---------|-----------------------------------------------------------------|------------------------------------------------------------------------|-----------------------------------------------|-------------------------------------------------|--------------------------------------------|--|
| 1       | CD45+/CD45RB+/CD3+/CD8a+/PD1+                                   | 1                                                                      | 1                                             |                                                 | 1                                          |  |
|         |                                                                 | 2                                                                      |                                               | 1                                               |                                            |  |
|         |                                                                 | 3                                                                      |                                               |                                                 | 1                                          |  |
|         |                                                                 | 4                                                                      | 1                                             |                                                 |                                            |  |
|         |                                                                 | 5                                                                      |                                               |                                                 | 1                                          |  |
|         |                                                                 | 6                                                                      | 1                                             |                                                 |                                            |  |
|         |                                                                 | 7                                                                      | 1                                             |                                                 |                                            |  |
|         |                                                                 | 8                                                                      |                                               |                                                 | 1                                          |  |
|         |                                                                 | 9                                                                      | 1                                             |                                                 |                                            |  |
|         |                                                                 | 10                                                                     | 1                                             |                                                 |                                            |  |
|         |                                                                 | 11                                                                     |                                               |                                                 | 1                                          |  |
|         |                                                                 | 12                                                                     | 1                                             |                                                 |                                            |  |
| 2       | CD45+/CD45RB+/CD3+/CD4+/PD1+                                    | 1                                                                      | 1                                             |                                                 | 1                                          |  |
|         |                                                                 | 2                                                                      |                                               | 1                                               |                                            |  |
|         |                                                                 | 3                                                                      |                                               |                                                 | 1                                          |  |
|         |                                                                 | 4                                                                      | 1                                             |                                                 |                                            |  |
|         |                                                                 | 5                                                                      | 1                                             |                                                 |                                            |  |
|         |                                                                 | 6                                                                      | 1                                             |                                                 |                                            |  |
|         |                                                                 | 7                                                                      | 1                                             |                                                 |                                            |  |
|         |                                                                 | 8                                                                      | 1                                             |                                                 |                                            |  |
|         |                                                                 | 9                                                                      | 1                                             |                                                 |                                            |  |
|         |                                                                 | 10                                                                     | 1                                             |                                                 |                                            |  |
|         |                                                                 | 11                                                                     | 1                                             |                                                 |                                            |  |
| 3       | CD45+/CD45RB+/CD3+/CD8a+/PD1+/LAG3+                             | 1                                                                      | 1                                             |                                                 | 1                                          |  |
|         |                                                                 | 2                                                                      |                                               | 1                                               |                                            |  |
|         |                                                                 | 3                                                                      |                                               |                                                 | 1                                          |  |
|         |                                                                 | 4                                                                      | 1                                             |                                                 |                                            |  |
|         |                                                                 | 5                                                                      | 1                                             |                                                 |                                            |  |
|         |                                                                 | 6                                                                      | 1                                             |                                                 |                                            |  |
|         |                                                                 | 7                                                                      |                                               |                                                 | 1                                          |  |
|         |                                                                 | 8                                                                      | 1                                             |                                                 |                                            |  |
|         |                                                                 | 9                                                                      |                                               |                                                 | 1                                          |  |
|         |                                                                 | 10                                                                     | 1                                             |                                                 |                                            |  |
| 4       | CD45+/CD45RB+/CD3+/CD8a+/PD1+/LAG3+/PD-L1+                      | 1                                                                      | 1                                             |                                                 | 1                                          |  |
|         |                                                                 | 2                                                                      | 1                                             |                                                 |                                            |  |
|         |                                                                 | 3                                                                      |                                               |                                                 | 1                                          |  |
|         |                                                                 | 4                                                                      |                                               |                                                 | 1                                          |  |
|         |                                                                 | 5                                                                      |                                               |                                                 | 1                                          |  |
|         |                                                                 | 6                                                                      | 1                                             |                                                 |                                            |  |
|         |                                                                 | 7                                                                      |                                               |                                                 | 1                                          |  |
|         |                                                                 | 8                                                                      |                                               |                                                 | 1                                          |  |
|         |                                                                 | 9                                                                      | 1                                             |                                                 |                                            |  |
|         |                                                                 | 10                                                                     |                                               |                                                 | 1                                          |  |
| 5       | CD45+/CD45RB+/CD3+/CD4+/CD20+/PD1+                              | 1                                                                      |                                               | 1                                               |                                            |  |
|         |                                                                 | 2                                                                      |                                               | 1                                               |                                            |  |
|         |                                                                 | 3                                                                      |                                               | 1                                               |                                            |  |
|         |                                                                 | 4                                                                      |                                               | 1                                               |                                            |  |
|         |                                                                 | 5                                                                      |                                               | 1                                               |                                            |  |
|         |                                                                 | 6                                                                      |                                               | 1                                               |                                            |  |
|         |                                                                 | 7                                                                      |                                               | 1                                               |                                            |  |
|         |                                                                 | 8                                                                      |                                               | 1                                               |                                            |  |
|         |                                                                 | 9                                                                      |                                               | 1                                               |                                            |  |
|         |                                                                 | 10                                                                     |                                               | 1                                               |                                            |  |
| 6       | CD45+/CD45RB+/IBA1+/CD163+/CD14+/CD68+/CD11b+/PD1+/LAG3+/PD-L1+ | 1                                                                      |                                               | 1                                               | 1                                          |  |
|         |                                                                 | 2                                                                      | 1                                             |                                                 |                                            |  |
|         |                                                                 | 3                                                                      | 1                                             |                                                 |                                            |  |
|         |                                                                 | 4                                                                      |                                               | 1                                               |                                            |  |
|         |                                                                 | 5                                                                      |                                               | 1                                               |                                            |  |
|         |                                                                 | 6                                                                      |                                               | 1                                               |                                            |  |
| 7       | CD45+/CD45RB+/CD3+/PD1+                                         | 1                                                                      |                                               | 1                                               |                                            |  |
|         |                                                                 | 2                                                                      |                                               | 1                                               |                                            |  |
|         |                                                                 | 3                                                                      |                                               | 1                                               |                                            |  |
|         |                                                                 | 4                                                                      |                                               | 1                                               |                                            |  |
|         |                                                                 | 5                                                                      |                                               | 1                                               |                                            |  |
|         |                                                                 | 6                                                                      |                                               | 1                                               |                                            |  |
| 8       | CD45+/CD45RB+/CD3+/CD8a+/IBA1+/PD1+                             | 1                                                                      | 1                                             |                                                 | 1                                          |  |
|         |                                                                 | 2                                                                      |                                               | 1                                               |                                            |  |
|         |                                                                 | 3                                                                      |                                               | 1                                               |                                            |  |
|         |                                                                 | 4                                                                      |                                               | 1                                               |                                            |  |
|         |                                                                 | 5                                                                      |                                               | 1                                               |                                            |  |
|         |                                                                 | 6                                                                      |                                               | 1                                               |                                            |  |
| 9       | CD45+/CD45RB+/CD3+/CD8a+/CD20+/PD1+/LAG3+                       | 1                                                                      |                                               | 1                                               |                                            |  |
|         |                                                                 | 2                                                                      |                                               | 1                                               |                                            |  |
|         |                                                                 | 3                                                                      |                                               | 1                                               |                                            |  |
|         |                                                                 | 4                                                                      |                                               | 1                                               |                                            |  |
|         |                                                                 | 5                                                                      |                                               | 1                                               |                                            |  |
|         |                                                                 | 6                                                                      |                                               | 1                                               |                                            |  |
| 10      | CD45+/CD45RB+/IBA1+/CD163+/CD14+/CD68+/PD1+/LAG3+/PD-L1+        | 1                                                                      | 1                                             |                                                 | 1                                          |  |
|         |                                                                 | 2                                                                      |                                               | 1                                               |                                            |  |
|         |                                                                 | 3                                                                      | 1                                             |                                                 |                                            |  |
|         |                                                                 | 4                                                                      | 1                                             |                                                 |                                            |  |
|         |                                                                 | 5                                                                      |                                               | 1                                               |                                            |  |
| 11      | CD45+/CD45RB+/CD3+/CD8a+/FOXP3+/PD1+/LAG3+                      | 1                                                                      | 1                                             |                                                 | 1                                          |  |
|         |                                                                 | 2                                                                      |                                               | 1                                               |                                            |  |
|         |                                                                 | 3                                                                      |                                               | 1                                               |                                            |  |

|    |                                                                   |   |   |   |   |
|----|-------------------------------------------------------------------|---|---|---|---|
|    |                                                                   | 4 | 1 |   |   |
|    |                                                                   | 5 |   | 1 |   |
| 12 | CD45+/CD45RB+/CD3+/CD4+/CD8a+/PD1+                                | 1 |   | 1 |   |
|    |                                                                   | 2 |   | 1 |   |
|    |                                                                   | 3 |   | 1 |   |
|    |                                                                   | 4 |   | 1 |   |
|    |                                                                   | 5 |   | 1 |   |
| 13 | CD45+/CD45RB+/IBA1+/CD14+/CD11b+/PD1+/LAG3+/PD-L1+                | 1 |   | 1 |   |
|    |                                                                   | 2 |   | 1 |   |
|    |                                                                   | 3 |   | 1 |   |
|    |                                                                   | 4 |   | 1 |   |
| 14 | CD45+/CD45RB+/CD3+/CD20+/PD1+                                     | 1 |   | 1 |   |
|    |                                                                   | 2 |   | 1 |   |
|    |                                                                   | 3 |   | 1 |   |
|    |                                                                   | 4 |   | 1 |   |
| 15 | CD45+/CD45RB+/CD3+/IBA1+/CD14+/CD11b+/PD1+/LAG3+/PD-L1+           | 1 |   | 1 |   |
|    |                                                                   | 2 |   | 1 |   |
|    |                                                                   | 3 |   | 1 |   |
|    |                                                                   | 4 |   | 1 |   |
| 16 | CD45+/CD45RB+/CD3+/CD8a+/CD20+/PD1+                               | 1 |   | 1 |   |
|    |                                                                   | 2 |   | 1 |   |
|    |                                                                   | 3 |   | 1 |   |
|    |                                                                   | 4 |   | 1 |   |
| 17 | CD45+/CD45RB+/CD3+/CD8a+/FOXP3+/PD1+                              | 1 | 1 |   | 1 |
|    |                                                                   | 2 | 1 |   |   |
|    |                                                                   | 3 | 1 |   |   |
|    |                                                                   | 4 | 1 |   |   |
| 18 | CD45+/CD45RB+/CD3+/CD4+/IBA1+/CD163+/CD14+/PD1+                   | 1 |   | 1 |   |
|    |                                                                   | 2 |   | 1 |   |
|    |                                                                   | 3 |   | 1 |   |
|    |                                                                   | 4 |   | 1 |   |
| 19 | CD45+/CD45RB+/CD3+/CD8a+/CD11b+/PD1+                              | 1 |   | 1 |   |
|    |                                                                   | 2 |   | 1 |   |
|    |                                                                   | 3 |   | 1 |   |
| 20 | CD45+/CD45RB+/CD3+/CD8a+/IBA1+/PD1+/PD-L1+/LAG3+                  | 1 |   | 1 |   |
|    |                                                                   | 2 |   | 1 |   |
|    |                                                                   | 3 |   | 1 |   |
| 21 | 45+/CD45RB+/CD3+/CD8a+/IBA1+/CD14+/CD68+/CD11b+/PD1+/PD-L1+/LAG3+ | 1 |   | 1 |   |
|    |                                                                   | 2 |   | 1 |   |
|    |                                                                   | 3 |   | 1 |   |
